# Supplementary material
Source: publisher site journal article supplement (https://www.spandidos-publications.com/3194/downloadSupplementary)
Supplement: Supplementary file 1 [file downloadSupplementary]

## Sheet: different expression of miRNAs
Table SII. Normalized relative expression of differentially expressed miRNAs.
miRNA_name	Locus	0A	0B	0C	12A	12B	12C	24A	24B	24C	fc (0h_vs_12h)	fc (0h_vs_24h)	P-value (0h_vs_12h)	q value (0h_vs_12h)	P-value (0h_vs_24h)	q value (0h_vs_24h)	average (0h)	average (12h)	average (24h)	regulation	sig (0h_vs_12h)	sig (0h_vs_24h)
rno-let-7a-1-3p	chr17:16417916-16417937+	43.0806	34.7833	36.1825	14.1184	22.1363	18.2947	15.628	19.8291	13.617	2.0907	2.32396	0.00639301	0.0472099	0.006381	0.0280911	38.0155	18.1831	16.358	down	1	1
rno-let-7a-2-3p	chr8:45753325-45753346+	6.82272	7.10899	6.31758	0	1.56256	0.94628	1.77591	1.19273	1.61254	8.07118	4.4201	0.000218526	0.0027069	0.000375334	0.00252198	6.74976	0.83628	1.52706	no	1	1
rno-let-7a-5p	chr17:16417865-16417886+	8303.25	9537.21	9614.79	7167.89	5712.72	6829.15	5932.42	5240.25	5098.5	1.39298	1.68736	0.219445	0.504813	0.036941	0.111405	9151.75	6569.92	5423.72	down	0	0
rno-let-7b-3p	chr7:126590687-126590708+	35.0883	35.0371	31.9708	7.17126	7.29195	6.62396	4.08459	9.24364	5.73348	4.84163	5.35609	2.94241e-13	1.02717e-11	2.62255e-07	3.34813e-06	34.0321	7.02906	6.3539	down	1	1
rno-let-7b-5p	chr7:126590633-126590654+	3268.47	4041.97	3997.5	2815.61	2449.05	2628.61	2605.79	1946.53	1959.06	1.43261	1.73664	0.1421	0.401223	0.0718048	0.183342	3769.31	2631.09	2170.46	down	0	0
rno-let-7c-1-3p	chr11:16052933-16052954+	27.6807	29.7054	24.696	2.68922	4.16683	4.10055	4.26218	2.83273	2.32923	7.49157	8.70977	1.76949e-14	6.79485e-13	2.35995e-15	6.45615e-14	27.3607	3.6522	3.14138	down	1	1
rno-let-7c-2-3p	chr7:126590273-126590294+	39.1819	38.0839	36.7569	18.1522	21.0946	18.137	15.9832	15.8036	12.9003	1.98702	2.55158	0.00199439	0.0170188	6.42738e-05	0.000512851	38.0076	19.1279	14.8957	down	0	1
rno-let-7c-5p	chr11:16052888-16052909+	13799.4	18067.5	16507.5	15943.5	13640.6	15415.5	14083.3	10076.8	10796.9	1.075	1.38383	0.342375	0.612967	0.901971	0.967661	16124.8	14999.9	11652.3	down	0	0
rno-let-7d-3p	chr17:16420047-16420068+	654.786	842.669	682.299	605.075	657.838	707.66	638.971	557.004	512.968	1.10615	1.2755	0.456507	0.716072	0.555987	0.764563	726.585	656.858	569.648	down	0	0
rno-let-7d-5p	chr17:16419993-16420014+	2206.08	2553.4	2573.17	2773.93	2119.35	2625.93	2413.28	1947.58	2238.75	0.975189	1.11107	0.10474	0.329675	0.0629294	0.167158	2444.22	2506.4	2199.87	no	0	0
rno-let-7e-3p	chr1:59704440-59704461+	30.6048	29.9593	25.2703	2.01692	6.77109	2.52341	6.57085	6.11273	8.42106	7.5883	4.06709	3.37826e-08	7.63089e-07	1.32103e-08	2.1998e-07	28.6115	3.77047	7.03488	no	1	1
rno-let-7e-5p	chr1:59704395-59704416+	1847.2	2507.19	2152.38	2094.9	1743.56	1984.82	1687.82	1411.29	1582.98	1.11737	1.38971	0.542607	0.766034	0.872736	0.954838	2168.92	1941.09	1560.7	down	0	0
rno-let-7f-1-3p	chr17:16418284-16418304+	4.4835	3.04671	3.6374	1.79281	1.30213	0.315427	0.710363	0.149091	0.358343	3.27461	9.17034	0.0525767	0.214781	0.000754899	0.00473977	3.72254	1.13679	0.405932	down	0	1
rno-let-7f-5p	chr17:16418228-16418249+	10774.2	15013.2	12179.2	13337.2	9479.01	11747.6	10685.1	8278.13	9955.12	1.09845	1.31289	0.52643	0.754945	0.763186	0.901191	12655.5	11521.3	9639.45	down	0	0
rno-let-7g-3p	chr8:114874520-114874540+	3.50883	4.82395	4.40316	1.12051	1.30213	1.73485	2.13109	1.49091	2.15006	3.06337	2.20648	0.0269987	0.136415	0.170833	0.35341	4.24531	1.38583	1.92402	no	1	0
rno-let-7g-5p	chr8:114874463-114874484+	2861.06	3196	3072.26	2528.54	1941.48	2375.32	1849.96	1777.46	1965.15	1.33365	1.6324	0.383072	0.655335	0.0377516	0.112199	3043.11	2281.78	1864.19	down	0	0
rno-let-7i-3p	chr7:66802792-66802813+	27.0959	37.0683	27.1848	20.6174	22.3967	30.281	19.1798	22.8109	22.0381	1.24632	1.42669	0.889287	0.946596	0.828504	0.938808	30.4497	24.4317	21.3429	down	0	0
rno-let-7i-5p	chr7:66802736-66802757+	17791.5	27698.4	20179.1	19026.7	14970.1	17406.8	17690.9	13947.5	15115.6	1.27752	1.40456	0.71722	0.854753	0.856651	0.950895	21889.7	17134.5	15584.7	down	0	0
rno-miR-100-3p	chr8:45746995-45747013+	27.4858	34.5294	26.6104	11.2051	10.9379	10.2514	11.3658	9.98909	9.49608	2.73583	2.8727	8.77967e-06	0.000129669	1.36441e-05	0.000137518	29.5419	10.7981	10.2837	down	1	1
rno-miR-100-5p	chr8:45746960-45746981+	3787.39	537.998	3786.53	2715.66	1135.72	1037.28	2032.17	2448.52	1751.4	1.65933	1.30164	0.458734	0.716072	0.955635	0.976022	2703.97	1629.55	2077.36	no	0	0
rno-miR-101a-3p	chr5:120168445-120168465-	1793.98	2522.42	1991	1334.08	1384.17	1444.81	1179.91	1169.92	1154.04	1.51509	1.80012	0.0679525	0.253084	0.0196696	0.0703669	2102.47	1387.69	1167.96	down	0	0
rno-miR-101a-5p	chr5:120168481-120168502-	1.94935	4.06228	3.6374	0.896407	2.08341	1.73485	1.42073	1.49091	1.43337	2.0466	2.22072	0.266556	0.547366	0.259408	0.459969	3.21634	1.57156	1.44834	down	0	0
rno-miR-101b-3p	chr1:247263783-247263803+	1202.94	1828.79	1370.53	1123.2	1037.02	1211.55	1297.83	1139.5	1098.5	1.30562	1.24504	0.582329	0.779143	0.494696	0.720412	1467.42	1123.92	1178.61	no	0	0
rno-miR-103-2-5p	chr3:123833685-123833701+	1.16961	1.26946	0.574326	1.12051	1.56256	2.20799	1.06554	1.34182	1.43337	0.616103	0.784589	0.227813	0.508606	0.299181	0.511547	1.00447	1.63035	1.28024	no	0	0
rno-miR-103-3p	chr10:20606766-20606788+	4034.76	5531.05	4574.31	4115.63	3638.42	3870.76	4052.44	3107.65	3595.61	1.21637	1.31466	0.948699	0.966612	0.770345	0.901191	4713.37	3874.94	3585.23	down	0	0
rno-miR-106b-3p	chr12:19307761-19307782-	272.519	378.554	306.881	287.523	262.77	264.328	299.773	240.633	375.543	1.17595	1.04586	0.832047	0.926201	0.105841	0.247177	319.318	271.54	305.316	no	0	0
rno-miR-106b-5p	chr12:19307802-19307822-	481.879	539.521	150.665	457.616	491.165	153.613	439.182	463.375	90.4816	1.0632	1.18028	0.70949	0.8499	0.728365	0.880012	390.688	367.465	331.013	down	0	0
rno-miR-107-3p	chr1:253128263-253128285-	172.322	169.092	174.021	45.7168	169.538	1054	931.818	123.447	922.016	0.406093	0.260679	0.168085	0.436112	0.000191758	0.00141237	171.812	423.085	659.094	up	0	1
rno-miR-107-5p	chr1:253128299-253128322-	0.584804	0.507785	0.574326	0.224102	0	2.3657	0.710363	0.447273	0	0.643646	1.43993	0.534863	0.763521	0.948986	0.974032	0.555638	0.863267	0.385879	no	0	0
rno-miR-10a-3p	chr10:84166012-84166033+	45.6147	37.83	39.2456	33.3912	32.0325	34.2238	28.7697	25.4946	39.9552	1.23124	1.30218	0.860963	0.936572	0.83284	0.940087	40.8968	33.2158	31.4065	down	0	0
rno-miR-10a-5p	chr10:84165971-84165993+	45934.4	32620.1	44393.7	38899.6	49851.1	39354.8	40992.7	48907.1	43401.2	0.959742	0.922335	0.218193	0.504813	0.0233824	0.0778736	40982.7	42701.8	44433.7	up	0	0
rno-miR-10b-3p	chr3:61648042-61648062+	41.716	27.9282	39.2456	12.9979	25.5218	24.761	21.8437	6.85818	12.7212	1.72074	2.62872	0.160336	0.418837	0.0343651	0.104459	36.2966	21.0936	13.8077	down	0	1
rno-miR-10b-5p	chr3:61648005-61648026+	195092	154356	187859	174502	244388	194542	194228	227877	181211	0.875903	0.89059	0.0641786	0.246446	0.00611169	0.0272183	179102	204477	201105	no	0	0
rno-miR-1224	chr11:83992692-83992712-	5.84804	8.37845	4.21172	7.61946	3.9064	3.62741	4.26218	3.57818	1.61254	1.21678	1.95053	0.99449	0.997379	0.363719	0.590273	6.14607	5.05109	3.15097	down	0	0
rno-miR-1249	chr7:125861222-125861243-	23.0023	25.6431	26.419	12.9979	15.6256	12.6171	16.8711	13.7164	9.49608	1.82016	1.8727	0.0263319	0.136415	0.131033	0.288424	25.0215	13.7469	13.3612	down	0	0
rno-miR-125a-3p	chr1:59704879-59704900+	52.0476	50.5246	51.4979	17.2558	22.9175	19.0833	18.4694	16.2509	19.3505	2.60005	2.84941	3.95836e-06	6.08003e-05	1.23201e-07	1.68522e-06	51.3567	19.7522	18.0236	down	1	1
rno-miR-125a-5p	chr1:59704841-59704864+	5815.29	5025.29	6351.09	5091.37	5027.8	4915.45	4324.15	3877.26	4095.32	1.14347	1.39807	0.735641	0.861238	0.809768	0.928018	5730.56	5011.54	4098.91	down	0	0
rno-miR-125b-1-3p	chr8:45798314-45798335+	1333.94	988.657	1039.15	165.387	129.432	165.757	172.796	177.567	173.08	7.29901	6.42237	1.18019e-29	9.06386e-28	6.9738e-27	3.81567e-25	1120.58	153.525	174.481	no	1	1
rno-miR-125b-2-3p	chr11:16097401-16097422+	1504.51	1570.83	1452.28	714.885	606.794	722.327	656.197	660.026	751.803	2.21507	2.18934	3.50221e-09	8.96567e-08	6.48557e-07	8.01281e-06	1509.21	681.335	689.342	no	1	1
rno-miR-125b-5p	chr11:16097362-16097383+	4776.88	3307.96	4553.25	4374.91	3989.22	4691.97	4376.72	4904.65	4306.03	0.967984	0.930133	0.20919	0.502055	0.0269421	0.0859901	4212.7	4352.03	4529.13	up	0	0
rno-miR-126a-3p	chr3:4042533-4042554+	69.5917	95.9713	85.5745	92.3299	72.1382	78.0681	65.531	59.9346	70.7727	1.03546	1.27976	0.314351	0.591719	0.635809	0.80784	83.7125	80.8454	65.4128	down	0	0
rno-miR-126a-5p	chr3:4042496-4042516+	1538.23	1259.56	1253.37	11.6533	1260.99	1685.01	1323.41	1590.5	1488.02	1.36972	0.920314	0.890354	0.946596	0.0048531	0.0235473	1350.39	985.884	1467.31	no	0	0
rno-miR-126b	chr3:4042491-4042512-	0.389869	0.253892	0	0.672305	0.260427	0.47314	0	0.447273	0.179171	0.457909	1.02764	0.383985	0.655335	0.821487	0.933618	0.214587	0.468624	0.208815	no	0	0
rno-miR-128-1-5p	chr13:44916548-44916568+	86.3561	76.9294	87.1061	8.51587	7.8128	8.35881	5.32772	9.24364	7.5252	10.1425	11.3317	2.2026e-33	2.1145e-31	3.17446e-24	1.21582e-22	83.4639	8.22916	7.36552	down	1	1
rno-miR-128-3p	chr13:44916583-44916603+	616.384	660.374	289.077	821.109	758.623	363.056	383.418	704.753	806.092	0.805973	0.82662	0.157617	0.418837	0.0781074	0.194254	521.945	647.596	631.421	no	0	0
rno-miR-129-2-3p	chr3:83137312-83137333-	3.70376	4.82395	4.78605	5.60254	6.77109	4.88911	8.34676	6.26182	6.62934	0.771243	0.626886	0.148613	0.413532	0.0035	0.0176382	4.43792	5.75425	7.07931	up	0	0
rno-miR-129-5p	chr3:83137355-83137375-	10.3315	12.9485	10.1464	12.9979	10.9379	9.4628	11.5434	11.6291	13.0795	1.00083	0.922057	0.411176	0.666402	0.0395129	0.115523	11.1421	11.1329	12.084	no	0	0
rno-miR-1306-3p	chr11:86857680-86857701+	0.584804	2.03114	0.574326	1.12051	1.56256	0.788567	1.06554	0.298182	1.07503	0.918953	1.30816	0.650678	0.828117	0.929791	0.971455	1.06342	1.15721	0.812917	no	0	0
rno-miR-1306-5p	chr11:86857641-86857662+	32.5541	37.3222	29.8649	36.9768	38.0223	32.489	33.5646	33.2473	28.3091	0.927928	1.04857	0.0921182	0.304943	0.0628719	0.167158	33.2471	35.8294	31.707	no	0	0
rno-miR-130a-3p	chr3:72141049-72141070-	2531.42	3101.8	2604.76	2710.73	3108.71	3305.36	2775.21	2717.33	4245.65	0.902812	0.845946	0.0131984	0.0810812	0.00509998	0.0238957	2745.99	3041.6	3246.06	up	0	0
rno-miR-130a-5p	chr3:72141089-72141110-	16.5695	30.9749	27.5676	12.5497	9.89621	12.9325	13.4969	8.49818	7.70437	2.1231	2.52907	0.0185228	0.10616	0.019578	0.0703669	25.0373	11.7928	9.89982	down	1	1
rno-miR-130b-3p	chr11:88129823-88129844+	2.92402	3.55449	3.25451	3.13742	2.86469	5.99311	3.37422	1.34182	3.40426	0.811408	1.1986	0.282734	0.562538	0.770327	0.901191	3.24434	3.99841	2.70677	no	0	0
rno-miR-130b-5p	chr11:88129785-88129806+	0.584804	1.01557	0	0	0.260427	0.788567	0.710363	0.298182	0.895857	1.52563	0.840355	0.891481	0.946596	0.577369	0.773098	0.533458	0.349665	0.634801	no	0	0
rno-miR-132-3p	chr10:62015053-62015074+	60.0399	100.287	7.65768	74.1777	62.7628	65.2933	74.7657	6.11273	63.785	0.830645	1.16121	0.399848	0.657042	0.79586	0.920889	55.9949	67.4113	48.2211	no	0	0
rno-miR-132-5p	chr10:62015017-62015038+	3.50883	5.58563	0.382884	0.448203	0.520853	2.20799	2.48627	0.894546	0.358343	2.98307	2.53462	0.255502	0.533221	0.423836	0.651924	3.15911	1.05902	1.24639	no	0	0
rno-miR-133a-3p	chr18:2052492-2052513-	14.6201	14.218	13.9753	18.3763	14.063	15.6136	14.2073	12.6727	18.4547	0.890964	0.944385	0.127215	0.381644	0.0647196	0.168623	14.2711	16.0176	15.1116	no	0	0
rno-miR-133b-3p	chr9:26795696-26795717+	122.029	106.127	114.674	63.4208	78.9093	73.9676	52.3892	51.5855	45.8679	1.58499	2.28793	0.0584402	0.230238	7.00081e-05	0.000547206	114.277	72.0992	49.9475	down	0	1
rno-miR-133b-5p	chr9:26795659-26795679+	24.7567	36.5605	24.8875	0.224102	0	0	0	0.149091	0.179171	384.667	262.609	1.3886e-11	3.80873e-10	2.22236e-12	5.00685e-11	28.7349	0.0747007	0.109421	no	1	1
rno-miR-138-2-3p	chr19:11149754-11149774-	0.779739	1.77725	1.72298	1.12051	0.78128	0.94628	0.532772	0.298182	0	1.50276	5.15067	0.718972	0.854753	0.106923	0.248192	1.42666	0.949357	0.276985	down	0	0
rno-miR-138-5p	chr19:11149799-11149821-	178.95	148.527	95.3381	85.3828	163.288	86.1115	177.591	94.9709	73.8186	1.26296	1.22067	0.877006	0.946167	0.706878	0.862211	140.938	111.594	115.46	no	0	0
rno-miR-139-5p	chr1:166589551-166589572+	34.3085	29.4515	33.1195	37.8732	11.7192	8.35881	15.628	11.1818	22.9339	1.67174	1.94757	0.388297	0.65636	0.119731	0.271343	32.2932	19.3171	16.5812	down	0	0
rno-miR-1-3p	chr18:2054945-2054966-	1.36454	1.77725	1.72298	0.672305	0.520853	0.94628	0.177591	0.149091	0.716686	2.27385	4.66256	0.302137	0.580102	0.080472	0.197569	1.62159	0.713146	0.347789	down	0	0
rno-miR-140-3p	chr19:39609011-39609031+	2188.14	2787.48	2312.81	2048.29	1924.03	2072.2	2234.98	1852.75	1951.89	1.20579	1.20677	0.996875	0.997379	0.239863	0.439872	2429.48	2014.84	2013.21	down	0	0
rno-miR-140-5p	chr19:39608972-39608993+	54.7767	54.0791	45.9461	45.7168	50.7832	50.1528	40.8459	45.3237	48.3763	1.05557	1.15055	0.347874	0.615592	0.208535	0.39539	51.6006	48.8843	44.8486	down	0	0
rno-miR-143-3p	chr18:56971297-56971318-	15218.7	20637.1	16335	14694.1	13134.9	14409.2	14428.2	13012.7	14524.7	1.23563	1.24366	0.843621	0.929712	0.391107	0.618983	17396.9	14079.4	13988.5	down	0	0
rno-miR-143-5p	chr18:56971332-56971352-	98.442	78.1988	101.464	12.5497	62.7628	22.0799	19.7126	62.0218	27.9507	2.85551	2.53548	0.0260265	0.136415	0.0651941	0.168712	92.7016	32.4641	36.5617	no	1	0
rno-miR-145-3p	chr18:56969921-56969941-	437.628	172.139	401.262	331.895	212.769	221.745	282.902	331.727	294.379	1.31918	1.11223	0.707402	0.8499	0.498314	0.722933	337.01	255.47	303.003	no	0	0
rno-miR-145-5p	chr18:56969957-56969979-	2520.31	1885.91	2389.77	2530.78	4972.07	3503.6	3323.08	3664.66	2911.71	0.617455	0.686502	0.003034	0.024272	2.30033e-05	0.000207285	2265.33	3668.82	3299.82	no	0	0
rno-miR-146a-5p	chr10:28962533-28962554-	0.584804	1.77725	1.53154	2.91332	1.56256	0.630853	0.887953	0.596364	0.895857	0.762443	1.63584	0.469991	0.716713	0.76944	0.901191	1.29786	1.70224	0.793391	no	0	0
rno-miR-146b-3p	chr1:266089542-266089562+	0	0	0.765768	0.672305	0.78128	0.94628	0	0.149091	0.358343	0.319088	1.5091	0.250527	0.531504	0.935945	0.971455	0.255256	0.799955	0.169145	no	0	0
rno-miR-146b-5p	chr1:266089502-266089525+	375.444	551.708	515.936	437.222	248.447	240.197	217.904	205.149	305.487	1.55864	1.98079	0.240037	0.520758	0.038984	0.114853	481.029	308.622	242.847	down	0	0
rno-miR-147	chr3:114775390-114775411+	8.967	9.14012	9.95498	6.27485	6.51067	5.20454	2.84145	3.13091	9.67526	1.55987	1.79338	0.289603	0.573235	0.485208	0.717508	9.35403	5.99669	5.21587	down	0	0
rno-miR-148a-3p	chr4:81013285-81013305-	6790.36	6766.74	5678.55	5659.24	5953.09	4280.03	4899.37	5516.81	5637.45	1.21037	1.19821	0.987564	0.99534	0.245186	0.445053	6411.88	5297.45	5351.21	no	0	0
rno-miR-148a-5p	chr4:81013321-81013343-	9.74674	10.4096	953.189	327.637	3.12512	2.83884	2.13109	3.42909	3.94177	2.91769	102.436	-	-	-	-	324.448	111.2	3.16732	down	0	0
rno-miR-148b-3p	chr7:144912098-144912119+	342.11	293.753	254.235	286.402	316.679	370.153	236.373	352.153	281.657	0.914578	1.02289	0.0653594	0.248495	0.10258	0.241967	296.699	324.411	290.061	no	0	0
rno-miR-148b-5p	chr7:144912061-144912082+	215.793	189.15	243.131	4.25793	160.162	14.9828	123.781	21.7673	14.1545	3.6124	4.058	0.231301	0.510457	0.0266331	0.0859901	216.025	59.8009	53.2343	down	0	1
rno-miR-149-3p	chr9:100016501-100016518+	1.75441	2.03114	0.191442	0	0	0	0	0	0	132.566	132.566	0.0132038	0.0810812	0.012763	0.049376	1.32566	0	0	no	1	1
rno-miR-149-5p	chr9:100016455-100016477+	2083.27	2237.55	2298.45	2131.43	2115.45	2069.04	2815.7	2379.34	1921.97	1.04803	0.930063	0.184509	0.46308	0.00725051	0.0305159	2206.42	2105.31	2372.34	no	0	0
rno-miR-150-5p	chr1:101115989-101116010+	6.04298	8.12456	10.1464	6.72305	10.6775	9.14737	9.5899	7.30546	8.24188	0.915851	0.967248	0.343374	0.612967	0.187137	0.364797	8.10465	8.84931	8.37908	no	0	0
rno-miR-151-3p	chr7:114485573-114485593-	9498.78	9148.25	7965.13	8644.72	8284.69	8889.83	7548.49	8412.76	9149.75	1.03071	1.05978	0.139954	0.401062	0.0323337	0.0998694	8870.72	8606.41	8370.33	down	0	0
rno-miR-151-5p	chr7:114485608-114485628-	2158.71	2048.15	2134.39	2265.67	1714.65	2233.38	2214.56	2170.32	2539.75	1.02053	0.915753	0.218144	0.504813	0.000237941	0.00165694	2113.75	2071.23	2308.21	no	0	0
rno-miR-152-3p	chr10:84719371-84719391+	346.204	250.846	252.895	222.981	243.238	260.858	174.216	263.444	187.951	1.16899	1.35858	0.876588	0.946167	0.979611	0.98541	283.315	242.359	208.537	down	0	0
rno-miR-152-5p	chr10:84719333-84719355+	963.562	1054.67	1061.55	199.451	179.174	181.528	193.219	176.375	189.563	5.49811	5.5079	1.01063e-43	1.29361e-41	6.64598e-52	8.4847e-50	1026.59	186.718	186.386	down	1	1
rno-miR-155-3p	chr11:24176645-24176665+	3.50883	4.06228	4.78605	0	0.78128	0.788567	0	0.149091	1.43337	7.87157	7.80882	0.00158033	0.0144487	0.020124	0.070711	4.11905	0.523282	0.527487	no	1	1
rno-miR-155-5p	chr11:24176606-24176628+	516.967	462.592	501.004	728.107	759.664	768.537	897.366	854.738	905.532	0.656188	0.557098	2.23509e-07	4.29137e-06	1.43758e-17	4.58827e-16	493.521	752.103	885.879	up	0	0
rno-miR-15b-3p	chr2:165605980-165606001+	97.2724	163.507	93.4237	91.6576	72.9195	109.768	84.178	84.6837	87.794	1.29109	1.38007	0.757769	0.884447	0.992823	0.995023	118.068	91.4484	85.5519	down	0	0
rno-miR-15b-5p	chr2:165605942-165605963+	789.291	735.78	729.968	681.942	727.632	840.928	578.235	622.902	555.073	1.00202	1.28404	0.131773	0.383339	0.581846	0.773098	751.68	750.167	585.403	down	0	0
rno-miR-16-3p	chr2:165606130-165606150+	11.1113	8.88623	9.95498	4.48203	4.16683	5.20454	4.61736	4.92	4.47928	2.16211	2.13693	0.0280825	0.140048	0.0632845	0.167158	9.98417	4.6178	4.67221	no	1	0
rno-miR-16-5p	chr2:165606088-165606109+	19646.3	19240.7	17639.1	19339.1	18567.6	21494.4	14937.1	16548.9	16956.4	0.9516	1.16687	0.0227009	0.126336	0.130946	0.288424	18842	19800.4	16147.5	no	0	0
rno-miR-17-1-3p	chr15:100179929-100179950+	52.6324	51.794	48.6263	32.0465	33.0742	45.2637	34.4526	36.2291	35.1176	1.38654	1.44663	0.391081	0.65636	0.634158	0.80784	51.0176	36.7948	35.2664	down	0	0
rno-miR-17-5p	chr15:100179892-100179914+	767.263	779.703	547.715	721.608	244.541	282.465	367.968	349.32	241.702	1.6776	2.18426	0.270392	0.549814	0.00863131	0.0347978	698.227	416.205	319.663	down	0	1
rno-miR-181a-1-3p	chr13:54952796-54952817+	1217.56	1625.16	1346.22	408.313	366.42	376.146	352.162	306.829	319.104	3.63977	4.28275	1.09975e-20	5.27879e-19	1.4141e-25	6.77002e-24	1396.31	383.626	326.032	down	1	1
rno-miR-181a-2-3p	chr3:23150435-23150453+	19.4935	24.8815	22.2073	14.5666	11.9796	10.5668	12.0762	5.51637	8.7794	1.79404	2.52474	0.046119	0.194612	0.0113173	0.0442297	22.1941	12.371	8.79066	down	0	1
rno-miR-181a-5p	chr13:54952756-54952778+	35951.8	58304.9	45212.8	54739.1	44948.6	49783.2	75010	57982.4	64028.5	0.933088	0.707892	0.0934332	0.306653	2.32722e-05	0.000207285	46489.8	49823.6	65673.6	up	0	0
rno-miR-181b-1-3p	chr13:54952978-54952998+	10.5265	14.7258	7.27479	0.448203	0.520853	0.94628	0.887953	0.149091	0.895857	16.9824	16.8281	1.48878e-08	3.57308e-07	5.74419e-08	8.46163e-07	10.8424	0.638445	0.6443	no	1	1
rno-miR-181b-5p	chr13:54952938-54952960+	5830.3	9172.62	7204.34	7933.87	6102.06	6565.29	8983.6	6592.5	7582	1.07796	0.958941	0.46737	0.716713	0.0227144	0.0769876	7402.42	6867.07	7719.37	no	0	0
rno-miR-181c-3p	chr19:25290233-25290254-	456.147	547.646	480.519	424.449	334.127	350.597	359.266	364.229	350.28	1.33822	1.38233	0.399696	0.657042	0.897779	0.967661	494.771	369.724	357.925	down	0	0
rno-miR-181c-5p	chr19:25290272-25290293-	1941.16	2529.02	1736	2074.96	1815.43	2116.99	2843.4	2514.27	2883.41	1.03309	0.753078	0.230137	0.510457	1.3742e-06	1.5949e-05	2068.73	2002.46	2747.03	no	0	0
rno-miR-181d-3p	chr19:25290062-25290081-	1.36454	1.01557	0.95721	0	0	0.47314	0	0	0	7.05356	111.244	0.115193	0.353873	0.00714562	0.0304086	1.11244	0.157713	0	down	0	1
rno-miR-181d-5p	chr19:25290101-25290123-	1015.61	1284.44	398.774	435.43	1025.3	1075.45	407.571	971.178	449.004	1.06413	1.47658	0.682247	0.842105	0.876765	0.954838	899.608	845.393	609.251	down	0	0
rno-miR-182	chr4:57459776-57459800-	308.972	287.914	44.0316	296.711	45.0538	28.5461	15.8056	157.291	185.442	1.73076	1.78758	0.66555	0.8352	0.687524	0.846582	213.639	123.437	119.513	down	0	0
rno-miR-183-3p	chr4:57463592-57463612-	1.36454	1.26946	0.765768	0.448203	1.56256	0.630853	0.532772	1.49091	1.61254	1.287	0.934973	0.901206	0.948118	0.502999	0.724243	1.13326	0.880539	1.21207	no	0	0
rno-miR-183-5p	chr4:57463631-57463652-	77.3891	35.291	57.2411	56.4736	60.9398	39.2706	42.2666	59.4873	45.5095	1.08448	1.15386	0.72558	0.856265	0.547287	0.759459	56.6404	52.228	49.0878	down	0	0
rno-miR-1839-3p	chr1:143360266-143360287+	12.4758	15.4874	13.5924	10.7569	14.3235	13.2479	12.2538	8.05091	11.2878	1.0842	1.31536	0.611176	0.800995	0.877553	0.954838	13.8519	12.7761	10.5308	down	0	0
rno-miR-1839-5p	chr1:143360227-143360248+	145.616	225.203	182.827	214.465	180.736	185.944	223.764	163.106	185.442	0.952681	0.967385	0.118332	0.35779	0.0289261	0.0915594	184.549	193.715	190.771	no	0	0
rno-miR-184	chr8:97175666-97175687-	2.33922	3.04671	1.72298	2.68922	2.08341	1.73485	13.1417	10.7345	12.7212	1.09242	0.194246	0.815665	0.921222	1.51356e-12	3.62309e-11	2.36964	2.16916	12.1991	no	0	1
rno-miR-1843a-3p	chr6:103567586-103567607-	1.36454	2.53892	2.10586	2.68922	0.78128	2.20799	1.59832	1.19273	1.61254	1.05826	1.36464	0.775836	0.89653	0.995023	0.995023	2.00311	1.89283	1.46786	down	0	0
rno-miR-1843a-5p	chr6:103567625-103567645-	38.2072	56.8719	43.0744	44.148	38.0223	43.2135	44.9304	39.9564	44.4345	1.10184	1.0683	0.555612	0.76625	0.0945242	0.226267	46.0512	41.7946	43.1071	no	0	0
rno-miR-1843b-3p	chr13:77065486-77065506+	0.194935	0.253892	0.191442	0.224102	0.260427	0.630853	0.177591	0	0.537514	0.574036	0.89535	0.485142	0.722072	0.754122	0.899777	0.213423	0.371794	0.238368	no	0	0
rno-miR-1843b-5p	chr13:77065449-77065471+	11.5011	18.2802	13.7838	12.3256	10.4171	9.62051	10.6554	9.09455	9.67526	1.34613	1.48054	0.638047	0.819432	0.714764	0.867234	14.5217	10.7877	9.8084	down	0	0
rno-miR-185-3p	chr11:86812759-86812777+	10.1366	10.4096	9.5721	4.25793	1.82299	5.36225	7.10363	2.98182	5.73348	2.63199	1.90394	0.0182435	0.106144	0.233771	0.432532	10.0394	3.81439	5.27298	no	1	0
rno-miR-185-5p	chr11:86812715-86812736+	60.0399	56.8719	63.1758	50.647	53.9083	54.2534	53.0996	47.8582	45.1512	1.13399	1.23256	0.689806	0.842105	0.462412	0.693102	60.0292	52.9362	48.703	down	0	0
rno-miR-187-3p	chr18:16390524-16390545-	17.1543	18.788	20.4843	16.3594	20.3133	21.1336	15.9832	15.0582	21.8589	0.976132	1.06666	0.276188	0.552376	0.219607	0.412301	18.8089	19.2688	17.6334	no	0	0
rno-miR-187-5p	chr18:16390565-16390582-	0.194935	0.507785	0.382884	0	0	0	0	0.298182	0.358343	36.1868	1.65356	0.248731	0.530626	0.885662	0.960931	0.361868	0	0.218842	no	0	0
rno-miR-188-3p	chrX:16110319-16110338+	3.89869	2.53892	4.21172	1.12051	2.34384	3.31198	3.01904	4.02546	2.5084	1.57155	1.11477	0.54734	0.76625	0.595612	0.778564	3.54978	2.25878	3.1843	no	0	0
rno-miR-188-5p	chrX:16110280-16110300+	823.599	1152.16	934.237	451.789	400.536	451.849	345.947	326.062	354.939	2.23129	2.83364	9.41441e-07	1.5718e-05	5.79566e-10	1.16828e-08	969.999	434.725	342.316	down	1	1
rno-miR-18a-3p	chr15:100180072-100180092+	31.1896	32.2443	30.6307	14.7907	21.6154	17.3485	23.9747	22.3636	20.7839	1.74989	1.40139	0.0431339	0.188939	0.839451	0.940087	31.3549	17.9182	22.3741	no	0	0
rno-miR-18a-5p	chr15:100180031-100180053+	278.952	224.187	211.16	218.051	276.052	287.196	174.749	283.72	218.41	0.914245	1.05528	0.0876318	0.297793	0.186591	0.364797	238.1	260.433	225.626	no	0	0
rno-miR-190a-3p	chr8:73030060-73030081-	1.55948	1.26946	0.95721	2.01692	0.78128	1.89256	0.887953	1.19273	1.61254	0.807151	1.02516	0.461634	0.716713	0.587382	0.773098	1.26205	1.56359	1.23107	no	0	0
rno-miR-190a-5p	chr8:73030096-73030117-	115.206	109.428	93.6151	80.6766	109.379	98.8863	83.29	92.8837	87.2565	1.10143	1.2081	0.563	0.769646	0.325856	0.540272	106.083	96.314	87.8101	down	0	0
rno-miR-190b-5p	chr2:189421147-189421167+	12.8657	10.9174	14.5496	15.6871	11.1983	11.9862	9.76749	12.0764	10.0336	0.986136	1.2025	0.411295	0.666402	0.582243	0.773098	12.7776	12.9572	10.6258	no	0	0
rno-miR-191a-3p	chr8:117354420-117354441+	15.5948	18.788	12.4437	5.37844	6.77109	6.78167	4.79495	5.51637	5.73348	2.47351	2.91848	0.00281844	0.0230272	0.00091562	0.00556639	15.6088	6.3104	5.34827	down	1	1
rno-miR-191a-5p	chr8:117354378-117354400+	45526.4	31302.9	37785.7	43798.9	50318.6	50941.4	48323.8	64685	56959.7	0.790127	0.674331	0.0114879	0.0747689	0.000100273	0.000768091	38205	48353	56656.2	up	0	0
rno-miR-191b	chr8:117354419-117354439-	0.779739	1.52335	1.53154	2.01692	1.30213	1.41942	0.710363	1.93818	2.15006	0.809255	0.799114	0.457381	0.716072	0.32543	0.540272	1.27821	1.57949	1.59953	up	0	0
rno-miR-192-3p	chr1:221635037-221635058+	0.194935	2.03114	1.34009	0.224102	0.260427	0	0.710363	0.447273	0.358343	7.36007	2.35238	0.0955419	0.310916	0.501726	0.724243	1.18872	0.16151	0.505326	no	0	0
rno-miR-192-5p	chr1:221634994-221635014+	4228.13	4677.46	4205.02	3843.79	3828.01	4270.25	4249.03	4424.87	4063.07	1.09785	1.02934	0.325394	0.60239	0.00125594	0.00717948	4370.2	3980.68	4245.66	no	0	0
rno-miR-193b-3p	chr14:30331063-30331081-	88.3054	88.6084	82.8944	78.2115	70.0548	102.829	71.3914	73.6509	69.3393	1.0347	1.2119	0.326294	0.60239	0.274867	0.477266	86.6027	83.6984	71.4605	down	0	0
rno-miR-194-3p	chr1:221634836-221634856+	0	0.507785	0.574326	0.224102	0.260427	0.315427	0.177591	0	0	1.35271	6.09328	0.93276	0.965226	0.409896	0.638171	0.360704	0.266652	0.059197	down	0	0
rno-miR-194-5p	chr1:221634800-221634821+	107.604	159.698	105.102	117.878	120.578	135.318	67.1293	110.625	118.611	0.996335	1.25657	0.201491	0.486621	0.67276	0.839307	124.135	124.591	98.7884	no	0	0
rno-miR-1949	chr18:28353214-28353236+	0.389869	0	0.382884	0.448203	0	0.47314	0.355181	0.149091	0.179171	0.838725	1.13068	0.800129	0.91172	0.917338	0.970554	0.257584	0.307114	0.227814	no	0	0
rno-miR-195-3p	chr10:56845353-56845375+	15.3998	16.503	15.5068	4.03383	3.64597	3.78512	3.19663	4.32364	5.19597	4.13519	3.72827	4.25769e-07	7.43161e-06	2.43914e-05	0.000212316	15.8032	3.82164	4.23875	no	1	1
rno-miR-195-5p	chr10:56845315-56845335+	75.6347	103.588	73.5137	72.3849	84.1178	62.2968	64.8206	70.3709	66.1142	1.15511	1.25549	0.776805	0.89653	0.518797	0.73854	84.2455	72.9332	67.1019	down	0	0
rno-miR-1956-3p	chr2:243819879-243819896+	0.194935	0.253892	0.574326	0.224102	0	0.157713	0	0	0	2.67971	34.1051	0.554623	0.76625	0.243666	0.4444	0.341051	0.127272	0	down	0	0
rno-miR-1956-5p	chr2:243819840-243819861+	0.194935	1.77725	0.574326	0.448203	0.260427	0.630853	0.710363	0.298182	0.358343	1.90111	1.863	0.657946	0.828364	0.741554	0.89313	0.848837	0.446494	0.455629	no	0	0
rno-miR-196a-5p	chr7:144584259-144584280+	9.35687	7.87066	9.38065	8.51587	11.7192	9.93594	8.70194	3.87636	4.12094	0.881912	1.59338	0.21551	0.504813	0.585583	0.773098	8.86939	10.057	5.56641	no	0	0
rno-miR-196b-3p	chr4:82199068-82199090-	1.94935	1.77725	0.382884	0.448203	0.520853	1.57713	1.06554	2.08727	0.358343	1.61398	1.17041	0.726933	0.856265	0.793603	0.920889	1.36983	0.848729	1.17038	no	0	0
rno-miR-196b-5p	chr4:82199104-82199125-	597.475	651.234	644.394	674.994	763.571	679.587	540.764	576.386	419.44	0.893752	1.23202	0.00947863	0.063856	0.465336	0.693102	631.034	706.051	512.197	no	0	0
rno-miR-199a-3p	chr13:80125556-80125577+	10037.4	13455.8	10442.4	10794.3	9706.88	11097.2	10863.8	9108.56	11040.5	1.07397	1.09424	0.319265	0.595274	0.0591157	0.161724	11311.9	10532.8	10337.6	down	0	0
rno-miR-199a-5p	chr13:80125517-80125539+	5088.38	3301.11	4352.24	3765.58	4330.11	4424.02	3377.06	4027.84	3726.05	1.01773	1.14471	0.362136	0.634978	0.34411	0.563222	4247.24	4173.24	3710.32	down	0	0
rno-miR-19a-3p	chr15:100180210-100180232+	156.533	117.806	170.766	195.641	266.156	179.162	193.574	214.542	207.66	0.694436	0.722836	0.00712696	0.0506806	0.000217793	0.00157387	148.368	213.653	205.259	no	0	0
rno-miR-19a-5p	chr15:100180174-100180193+	13.8404	13.4563	11.4865	10.0846	13.0213	9.93594	6.74844	9.24364	9.85443	1.17376	1.50052	0.925696	0.965226	0.679432	0.844878	12.9277	11.0139	8.6155	down	0	0
rno-miR-19b-1-5p	chr15:100180479-100180500+	2.14428	1.52335	0.574326	0.448203	0.520853	0.630853	0.710363	0.596364	0	2.65137	3.24625	0.273797	0.552376	0.303937	0.517368	1.41399	0.533303	0.435576	down	0	0
rno-miR-19b-3p	chr15:100180517-100180539+	417.55	313.557	453.717	490.783	534.395	343.184	497.254	534.789	394.894	0.86587	0.830327	0.112198	0.347453	0.00797185	0.0324811	394.941	456.121	475.646	up	0	0
rno-miR-200a-3p	chr5:173489380-173489401-	0	0.507785	0.574326	0.224102	0.78128	0.157713	0.355181	0	0	0.930372	3.04665	0.83218	0.926201	0.633612	0.80784	0.360704	0.387698	0.118394	no	0	0
rno-miR-200b-3p	chr5:173490160-173490182-	2.53415	0.507785	1.91442	0.672305	1.30213	0.94628	0.532772	0.596364	0.358343	1.69697	3.33205	0.556728	0.76625	0.188196	0.364797	1.65212	0.973572	0.495826	down	0	0
rno-miR-200c-3p	chr4:157236790-157236810-	1.94935	0.253892	1.91442	0.896407	2.08341	0.788567	0.532772	1.34182	0	1.09269	2.19656	0.943398	0.966612	0.61537	0.798938	1.37255	1.25613	0.624864	down	0	0
rno-miR-201-3p	chrX:155339186-155339207+	0	0	0.382884	0	0	0.157713	0.355181	0.149091	0.358343	2.42773	0.443864	0.888136	0.946596	0.460108	0.693102	0.127628	0.052571	0.287538	no	0	0
rno-miR-201-5p	chrX:155339151-155339170+	0	0.507785	0.382884	0.448203	0.260427	0.94628	0.177591	0.149091	0.895857	0.538198	0.72854	0.42036	0.672577	0.576045	0.773098	0.29689	0.551637	0.407513	no	0	0
rno-miR-202-5p	chr1:212295675-212295693-	0	0	0	0.448203	0.520853	0.157713	0	0.596364	0.716686	0	0	0.145618	0.408156	0.175806	0.35341	0	0.37559	0.437683	up	0	0
rno-miR-203a-3p	chr6:136705012-136705033+	0	0	0	0.224102	0.260427	0.315427	0	0.149091	0	0	0	0.252717	0.533205	0.792179	0.920889	0	0.266652	0.049697	no	0	0
rno-miR-204-5p	chr1:240403032-240403053+	0.194935	0.253892	0	0	0	0	0.532772	0.596364	1.07503	14.9609	0.203627	0.682741	0.842105	0.0599606	0.162872	0.149609	0	0.734722	no	0	0
rno-miR-205	chr13:112233336-112233358-	2.72909	1.52335	3.06307	2.46512	1.56256	1.57713	1.42073	1.19273	1.2542	1.30522	1.89146	0.82206	0.923118	0.448106	0.68105	2.4385	1.86827	1.28922	down	0	0
rno-miR-206-3p	chr9:26791814-26791835+	119.105	134.309	127.5	45.9409	33.0742	40.0592	28.0593	20.5746	23.1131	3.19896	5.30913	9.81463e-12	2.99839e-10	1.0918e-24	4.64621e-23	126.971	39.6914	23.9157	down	1	1
rno-miR-206-5p	chr9:26791776-26791797+	7.01765	7.36288	0.191442	0	0	0	0.177591	0	0	485.732	82.0536	0.000147864	0.00189266	0.000841256	0.00519679	4.85732	0	0.059197	no	1	1
rno-miR-208b-3p	chr15:33639543-33639560-	0.389869	1.01557	0.191442	0.896407	1.04171	0.630853	0.177591	0.149091	0.895857	0.621604	1.3062	0.37468	0.646649	0.941723	0.972183	0.532294	0.856323	0.407513	no	0	0
rno-miR-20a-3p	chr15:100180385-100180405+	2.72909	2.53892	3.6374	0.672305	2.60427	1.41942	1.9535	0.447273	0.358343	1.89638	3.22763	0.342272	0.612967	0.129089	0.288424	2.96847	1.56533	0.919705	down	0	0
rno-miR-20a-5p	chr15:100180349-100180371+	473.886	429.586	481.476	323.379	468.508	360.69	417.338	314.731	416.573	1.20161	1.20573	0.997379	0.997379	0.386018	0.613465	461.649	384.192	382.881	down	0	0
rno-miR-210-3p	chr1:214208378-214208399-	33.9186	48.4934	41.9258	27.3404	24.7405	25.0764	28.2369	25.0473	26.3382	1.61148	1.56159	0.0812817	0.28635	0.38244	0.610311	41.4459	25.7191	26.5408	no	0	0
rno-miR-210-5p	chr1:214208416-214208437-	1.75441	1.52335	1.14865	0.224102	0.260427	0.315427	0.177591	0.149091	0.716686	5.53332	4.24242	0.0519732	0.214599	0.115634	0.265196	1.47547	0.266652	0.347789	no	0	0
rno-miR-211-5p	chr1:125042144-125042165+	1.36454	2.03114	2.2973	1.34461	2.60427	2.3657	3.01904	4.92	2.32923	0.901561	0.554424	0.54059	0.766034	0.0330776	0.10135	1.89766	2.10486	3.42276	up	0	0
rno-miR-212-3p	chr10:62014773-62014794+	8.18726	6.85509	5.9347	12.1015	8.33365	9.62051	16.6935	10.5855	9.85443	0.69794	0.56491	0.0345948	0.169965	0.000681201	0.00434833	6.99235	10.0186	12.3778	up	0	0
rno-miR-212-5p	chr10:62014733-62014756+	4.09363	4.06228	3.25451	4.03383	2.60427	2.52341	2.84145	4.02546	4.65846	1.24547	0.990026	0.916051	0.961102	0.31739	0.533159	3.80347	3.05384	3.84179	no	0	0
rno-miR-214-3p	chr13:80130975-80130995+	3452.29	3517.93	3297.97	2479.24	2603.49	2865.34	2580.21	2366.22	2651.38	1.29191	1.35147	0.475942	0.716713	0.926224	0.971455	3422.73	2649.36	2532.6	down	0	0
rno-miR-214-5p	chr13:80130918-80130934+	391.819	421.969	379.055	328.085	318.241	338.137	298.885	284.466	340.426	1.21167	1.29127	0.944435	0.966612	0.587393	0.773098	397.614	328.154	307.926	down	0	0
rno-miR-217-5p	chr14:113119560-113119581+	0.389869	0.761677	0.574326	0.224102	0.520853	0.315427	1.42073	0.894546	0.716686	1.62759	0.569226	0.734217	0.861238	0.180656	0.358504	0.575291	0.353461	1.01065	no	0	0
rno-miR-218a-1-3p	chr14:66923109-66923129-	15.9846	13.7102	15.8897	15.463	13.5422	11.0399	1.42073	17.4436	2.68757	1.13833	2.1151	0.834546	0.926201	0.490195	0.71933	15.1948	13.3484	7.18397	down	0	0
rno-miR-218a-5p	chr10:20428685-20428705+	753.813	862.472	800.993	328.757	483.091	348.073	413.431	260.164	447.57	2.084	2.15604	0.000811944	0.00842666	0.00705881	0.0303767	805.759	386.64	373.722	down	1	1
rno-miR-219a-1-3p	chr20:3816185-3816206-	32.749	38.8455	30.8222	21.2897	20.8341	18.9256	19.7126	19.5309	27.7716	1.6776	1.52826	0.0415372	0.185468	0.525374	0.742502	34.1389	20.3498	22.3384	no	0	0
rno-miR-219a-5p	chr20:3816227-3816247-	18.9087	16.7569	2.87163	16.1353	3.9064	3.15427	3.01904	2.38546	13.7962	1.66138	2.00707	0.57886	0.777211	0.53481	0.75306	12.8457	7.73199	6.40023	down	0	0
rno-miR-219b	chr3:8407445-8407466+	1.55948	1.01557	1.91442	0.224102	0.260427	0.315427	2.30868	0.149091	0.358343	5.61215	1.59421	0.0499535	0.208501	0.799136	0.921895	1.49649	0.266652	0.938705	no	1	0
rno-miR-221-3p	chrX:3684544-3684566+	1650.9	1814.82	1721.45	1953.72	1817.26	2112.73	2384.69	2428.54	2041.48	0.881616	0.756731	0.00149615	0.0140127	2.64133e-08	4.21512e-07	1729.06	1961.24	2284.9	up	0	0
rno-miR-221-5p	chrX:3684504-3684526+	92.0092	31.9904	21.2501	18.6004	13.5422	29.4924	14.5624	20.7236	22.7548	2.35661	2.50254	0.0891258	0.300213	0.12988	0.288424	48.4166	20.545	19.3469	down	0	0
rno-miR-222-3p	chrX:3683980-3684000+	1100.8	1239.25	1124.91	1585.97	1357.08	1496.23	2484.32	2237.86	2154.18	0.780523	0.503895	1.58306e-05	0.000217106	1.09322e-30	8.37407e-29	1154.99	1479.76	2292.12	up	0	0
rno-miR-222-5p	chrX:3683940-3683960+	47.3691	65.2503	59.9213	4.70614	4.68768	4.10055	4.97254	3.42909	4.12094	12.7861	13.7784	1.40305e-28	7.69672e-27	2.29876e-29	1.46738e-27	57.5136	4.49812	4.17419	down	1	1
rno-miR-22-3p	chr10:62299648-62299669+	170157	195211	173446	184217	156284	176402	168010	155902	178831	1.04239	1.07175	0.152748	0.418837	0.00485701	0.0235473	179605	172301	167581	down	0	0
rno-miR-22-5p	chr10:62299610-62299631+	115.206	104.096	130.563	113.171	133.599	125.698	118.453	111.669	101.769	0.939316	1.05416	0.108565	0.338933	0.074821	0.187462	116.622	124.156	110.63	no	0	0
rno-miR-23a-3p	chr19:25318627-25318647+	3171.2	2873.05	3200.91	3414.41	3980.1	3623.15	3727.45	4077.04	3175.45	0.839122	0.842005	0.00510991	0.0395189	0.000412481	0.0027238	3081.72	3672.55	3659.98	no	0	0
rno-miR-23a-5p	chr19:25318591-25318612+	3.89869	6.6012	4.21172	0	0	0.94628	0.532772	0.298182	0.358343	15.5468	12.37	0.000739108	0.00788382	3.43405e-05	0.000285922	4.90387	0.315427	0.396432	no	1	1
rno-miR-23b-3p	chr17:823279-823299+	493.185	518.702	486.837	491.455	547.938	484.18	515.723	527.335	393.46	0.98369	1.0433	0.069214	0.253125	0.0433603	0.124865	499.575	507.858	478.839	no	0	0
rno-miR-24-1-5p	chr17:823973-823994+	11.1113	4.82395	6.12614	1.56871	0.78128	3.31198	0.532772	0.745455	1.07503	3.89642	9.37483	0.0135135	0.0810812	3.86303e-05	0.000314796	7.3538	1.88732	0.784419	down	1	1
rno-miR-24-2-5p	chr19:25318887-25318908+	1809.77	1496.44	1663.82	1352.01	2002.68	1983.25	1484.3	1665.5	1428.53	0.931076	1.08556	0.141041	0.401183	0.0912139	0.219717	1656.68	1779.31	1526.11	no	0	0
rno-miR-24-3p	chr17:824011-824032+	1040.76	913.505	847.131	913.887	791.176	787.147	607.005	594.873	618.679	1.12406	1.53876	0.603027	0.795747	0.263959	0.464575	933.799	830.737	606.852	down	0	0
rno-miR-25-3p	chr12:19307351-19307372-	11559	13663.5	10475.9	11133.2	10099.3	12117	9595.93	9697.17	9782.94	1.07043	1.22776	0.291099	0.573241	0.268389	0.469375	11899.5	11116.5	9692.01	down	0	0
rno-miR-25-5p	chr12:19307389-19307410-	38.2072	36.3066	42.1172	47.7337	48.4394	40.0592	37.6492	39.2109	37.8052	0.856119	1.01714	0.0397145	0.179416	0.041545	0.120543	38.877	45.4108	38.2218	no	0	0
rno-miR-26a-3p	chr8:127714495-127714515+	2.33922	0.507785	0.95721	0	0.78128	0.157713	0.177591	0	0.179171	4.05138	10.6632	0.187815	0.465296	0.044937	0.127488	1.26807	0.312998	0.118921	down	0	1
rno-miR-26a-5p	chr8:127714456-127714477+	21927	16614.5	20522	20253	21074.5	21457.8	19584.7	19929	23854.3	0.940722	0.932071	0.097187	0.313612	0.0140793	0.0533897	19687.8	20928.4	21122.7	up	0	0
rno-miR-26b-3p	chr9:81675325-81675346+	64.3285	77.945	14.9325	7.39536	10.9379	27.5998	32.3215	10.2873	19.3505	3.4225	2.53725	0.0225286	0.126336	0.162826	0.338925	52.402	15.311	20.6531	no	1	0
rno-miR-26b-5p	chr9:81675289-81675309+	5843.36	6385.9	5504.72	5555.71	5061.91	6312.95	4923.88	5335.07	5109.61	1.04745	1.15391	0.196758	0.478198	0.0645502	0.168623	5911.33	5643.52	5122.85	down	0	0
rno-miR-27a-3p	chr19:25318791-25318811+	4796.95	5027.32	4780.69	5315.69	4892.64	6072.44	5838.12	6377.22	5976.62	0.897068	0.802825	0.00607901	0.0457714	1.25342e-08	2.18209e-07	4868.32	5426.92	6063.99	up	0	0
rno-miR-27a-5p	chr19:25318749-25318770+	213.843	252.369	220.158	1.56871	4.16683	2.3657	1.9535	2.53455	1.97089	84.7241	106.267	3.43242e-74	1.31805e-71	2.16962e-98	4.15482e-96	228.79	2.70041	2.15298	down	1	1
rno-miR-27b-3p	chr17:823521-823541+	19201.7	16925.5	18558.8	18777.3	17282.7	19880.7	19080	19216.3	18853.7	0.977571	0.956885	0.0848401	0.296059	0.00119707	0.00694663	18228.7	18646.9	19050	up	0	0
rno-miR-27b-5p	chr17:823479-823502+	82.6523	101.811	74.2795	34.2876	36.9806	32.8044	33.5646	33.0982	35.4759	2.48618	2.53325	1.01373e-06	1.62196e-05	2.86428e-06	3.04727e-05	86.2476	34.6909	34.0462	down	1	1
rno-miR-296-3p	chr3:172357500-172357521-	62.769	77.945	71.025	57.37	51.0436	52.834	55.5859	48.6037	52.4972	1.31313	1.35135	0.517453	0.749818	0.94096	0.972183	70.5797	53.7492	52.2289	down	0	0
rno-miR-296-5p	chr3:172357535-172357555-	83.2371	87.339	80.2142	83.3658	3.64597	116.866	87.197	82.8946	82.9564	1.2301	0.991078	0.950109	0.966612	0.00128487	0.00723686	83.5968	67.9593	84.3493	no	0	0
rno-miR-298-3p	chr3:172357952-172357973-	24.1719	25.3892	17.4212	34.2876	35.1576	32.8044	32.1439	31.3091	11.467	0.655086	0.894051	0.000452079	0.00495995	0.174245	0.35341	22.3274	34.0832	24.9733	no	0	0
rno-miR-298-5p	chr3:172357992-172358014-	3454.44	3086.57	3630.5	3110.31	3273.56	2171.56	2531.02	2337.15	3101.82	1.1889	1.27623	0.949295	0.966612	0.665659	0.835893	3390.5	2851.81	2656.66	down	0	0
rno-miR-29a-3p	chr4:58343944-58343965-	2818.95	2787.99	2904.56	3572.41	2623.02	2937.25	3359.48	3681.8	3634.13	0.931983	0.7973	0.0587587	0.230238	2.29093e-07	3.0256e-06	2837.17	3044.23	3558.47	up	0	0
rno-miR-29a-5p	chr4:58343982-58344003-	64.5234	76.9294	75.4281	38.7696	76.0446	46.21	58.0721	0.745455	58.7682	1.34688	1.84445	0.62922	0.813537	0.646287	0.816923	72.2936	53.6747	39.1953	down	0	0
rno-miR-29b-1-5p	chr4:58344355-58344376-	31.1896	32.7521	32.928	5.60254	7.8128	6.93939	6.74844	8.2	6.271	4.75908	4.56514	1.01508e-11	2.99839e-10	9.90906e-11	2.10843e-09	32.2899	6.78491	7.07315	no	1	1
rno-miR-29b-3p	chr1:38238427-38238449+	137.234	146.242	133.626	61.628	78.6488	82.6418	41.201	82.5964	101.053	1.8711	1.85502	0.00175603	0.0153254	0.240035	0.439872	139.034	74.3062	74.9501	no	0	0
rno-miR-29b-5p	chr1:38238386-38238407+	1.75441	1.01557	0.574326	0.672305	0.520853	0.315427	0.355181	0.298182	0.179171	2.21685	4.01702	0.399713	0.657042	0.174507	0.35341	1.11477	0.502862	0.277511	down	0	0
rno-miR-29c-3p	chr1:38238957-38238978+	61.4044	70.0743	64.7074	55.3531	65.8879	83.2727	57.8946	56.5055	55.1848	0.959281	1.15686	0.158862	0.418837	0.134176	0.291986	65.3954	68.1712	56.5283	no	0	0
rno-miR-29c-5p	chr1:38238919-38238940+	7.21259	6.34731	6.50903	1.34461	1.30213	1.73485	1.59832	1.64	0.895857	4.58028	4.8544	0.000314123	0.00365525	0.000374465	0.00252198	6.68964	1.46053	1.37806	down	1	1
rno-miR-301b-3p	chr11:88129470-88129492+	1.55948	1.01557	0.765768	1.34461	0.520853	2.20799	1.42073	2.38546	1.43337	0.820144	0.637614	0.526889	0.754945	0.141546	0.302861	1.11361	1.35782	1.74652	up	0	0
rno-miR-3064-5p	chr10:94982094-94982113-	0.389869	0	0.765768	0.224102	0.260427	0.157713	0	0.149091	0.537514	1.79938	1.68312	0.70198	0.8499	0.848786	0.94777	0.385212	0.214081	0.228868	no	0	0
rno-miR-3065-5p	chr10:109195254-109195273+	0.779739	0	0.191442	0.672305	0	0.315427	0.177591	0.745455	0.179171	0.983243	0.881116	0.900975	0.948118	0.715525	0.867234	0.323727	0.329244	0.367406	up	0	0
rno-miR-3068-3p	chr6:111468737-111468758-	110.333	121.868	141.284	120.567	104.171	105.668	101.937	80.36	105.532	1.13038	1.29759	0.682918	0.842105	0.770008	0.901191	124.495	110.135	95.943	down	0	0
rno-miR-3068-5p	chr6:111468775-111468799-	2.14428	1.01557	1.91442	1.34461	1.56256	0.315427	9.23471	15.3564	1.2542	1.57459	0.196332	0.621899	0.806788	0.00180448	0.00973401	1.69142	1.0742	8.6151	no	0	1
rno-miR-3074	chr17:823971-823992-	10.1366	7.61677	8.42345	10.3087	10.1566	12.3016	10.833	14.3127	13.4379	0.79888	0.678444	0.0862811	0.296059	0.00222176	0.0118185	8.72561	10.9223	12.8612	up	0	0
rno-miR-3075	chr16:1822830-1822853+	3.50883	3.80839	2.48875	4.25793	3.12512	2.68113	3.37422	5.21818	3.94177	0.974344	0.782339	0.569217	0.769646	0.0896068	0.217211	3.26866	3.35473	4.17806	up	0	0
rno-miR-3099	chr1:70136980-70137001-	6.82272	5.58563	5.9347	6.27485	8.85451	6.46625	6.03808	6.85818	6.09183	0.849388	0.966029	0.2264	0.508406	0.17454	0.35341	6.11435	7.19854	6.32936	no	0	0
rno-miR-30a-3p	chr9:29542681-29542702+	245.618	329.298	237.771	261.975	241.415	279.941	236.196	206.789	232.923	1.03748	1.20236	0.234553	0.514677	0.285807	0.490871	270.896	261.11	225.303	down	0	0
rno-miR-30a-5p	chr9:29542640-29542661+	30972.8	41127.8	35846.5	33622.7	34040.9	32909.7	29155.1	25364.7	29967	1.07332	1.27768	0.308793	0.58412	0.560641	0.764563	35982.4	33524.4	28162.3	down	0	0
rno-miR-30c-1-3p	chr5:139699889-139699910-	40.3515	37.5761	0.95721	0.672305	10.9379	0.157713	5.50531	7.60364	8.42106	6.70338	3.66395	0.175408	0.449044	0.149001	0.312461	26.2949	3.92264	7.17667	no	0	0
rno-miR-30c-2-3p	chr9:29562429-29562450+	78.1688	112.474	89.4034	36.9768	33.0742	35.0124	34.8078	29.8182	36.3718	2.6655	2.7728	1.50727e-07	3.04628e-06	1.42414e-06	1.60426e-05	93.3487	35.0211	33.6659	down	1	1
rno-miR-30c-5p	chr5:139699927-139699949-	4735.74	5687.95	2580.64	2946.94	3353.25	3541.14	2571.87	2420.34	2444.61	1.3214	1.74864	0.68988	0.842105	0.253192	0.453918	4334.78	3280.44	2478.94	down	0	0
rno-miR-30d-3p	chr7:109286472-109286493-	151.854	143.195	25.2703	34.5117	33.3346	34.5392	29.1249	14.9091	20.0672	3.12856	4.99709	0.0162339	0.0959048	0.00265278	0.013918	106.773	34.1285	21.3671	down	1	1
rno-miR-30d-5p	chr7:109286512-109286533-	12041.1	14599.3	14562.2	13085.3	11793.7	10975.6	10201.7	7835.62	10664.1	1.14916	1.43556	0.710463	0.8499	0.681687	0.844939	13734.2	11951.5	9567.14	down	0	0
rno-miR-30e-3p	chr5:139702884-139702905-	341.526	504.738	342.107	21.5138	18.4903	226.161	185.937	14.76	17.9171	4.46479	5.43593	-	-	-	-	396.124	88.7217	72.8714	down	0	0
rno-miR-30e-5p	chr5:139702926-139702947-	9750.25	9360.25	983.82	8929.78	932.588	8612.57	6432.16	781.535	8291.51	1.08765	1.29597	0.896134	0.947976	0.931873	0.971455	6698.11	6158.31	5168.4	down	0	0
rno-miR-3102	chr1:165921224-165921244-	50.0982	46.9701	52.838	25.3235	24.7405	1.41942	23.7971	1.34182	3.7626	2.91174	5.1868	0.0994188	0.31814	0.0208011	0.0724255	49.9688	17.1611	9.63384	down	0	1
rno-miR-31a-3p	chr5:107206578-107206600+	123.978	107.904	114.482	95.6914	133.078	150.932	137.455	161.466	86.1814	0.912201	0.899408	0.117356	0.357658	0.0483331	0.136115	115.455	126.567	128.367	up	0	0
rno-miR-31a-5p	chr5:107206542-107206563+	2795.75	3827.94	3140.03	3016.86	2726.93	2726.86	3700.46	2783.68	3179.75	1.15265	1.01033	0.702119	0.8499	0.0193716	0.0703669	3254.57	2823.55	3221.3	no	0	0
rno-miR-320-3p	chr15:52134323-52134344+	435.289	574.305	502.918	544.791	516.166	521.243	564.206	461.138	508.847	0.955955	0.985869	0.0447748	0.192154	0.00464323	0.0230956	504.171	527.4	511.397	no	0	0
rno-miR-322-3p	chrX:158148221-158148240+	665.897	516.163	651.285	484.956	353.399	368.892	377.735	322.633	354.759	1.51862	1.73756	0.157124	0.418837	0.0791358	0.195542	611.115	402.416	351.709	down	0	0
rno-miR-322-5p	chrX:158148183-158148204+	3358.14	3204.12	3143.48	2618.4	2855.06	2956.65	2011.39	2059.39	2147.37	1.15132	1.56087	0.689734	0.842105	0.142393	0.302981	3235.25	2810.04	2072.72	down	0	0
rno-miR-32-3p	chr5:73934258-73934279-	1.55948	2.28503	1.14865	0.224102	0.78128	0.94628	0.355181	0.447273	0	2.55841	6.22236	0.266281	0.547366	0.055536	0.154132	1.66439	0.650554	0.267485	down	0	0
rno-miR-324-3p	chr10:56621176-56621197+	40.1566	56.3641	44.4145	30.7019	26.3031	30.1233	30.5456	28.7746	22.9339	1.61756	1.71341	0.0670958	0.252596	0.176244	0.35341	46.9784	29.0428	27.418	down	0	0
rno-miR-324-5p	chr10:56621141-56621163+	82.4574	96.4791	87.6804	61.4039	74.482	65.2933	50.0806	52.7782	42.1053	1.32527	1.83919	0.483398	0.722072	0.0255117	0.0842326	88.8723	67.0597	48.3214	down	0	0
rno-miR-325-3p	chrX:76334294-76334315-	6.04298	5.07785	8.04056	2.91332	4.16683	3.15427	4.43977	3.28	4.65846	1.87225	1.54799	0.170733	0.44001	0.63138	0.80784	6.38713	3.41147	4.12608	no	0	0
rno-miR-325-5p	chrX:76334331-76334353-	0.389869	0.253892	0.574326	0.896407	0.520853	0.94628	0	0	0.179171	0.515366	6.79846	0.30078	0.580102	0.253625	0.453918	0.406029	0.787847	0.0597237	no	0	0
rno-miR-32-5p	chr5:73934298-73934319-	1.16961	0.253892	0.574326	1.12051	0.78128	0.47314	0.887953	0.149091	0.537514	0.841216	1.26882	0.684221	0.842105	0.979812	0.98541	0.665943	0.791643	0.524853	no	0	0
rno-miR-328a-3p	chr19:37263214-37263235-	206.436	236.882	208.863	204.157	187.507	204.87	200.677	256.884	244.927	1.09328	0.928387	0.343683	0.612967	0.00332501	0.0169797	217.394	198.845	234.163	no	0	0
rno-miR-330-3p	chr1:80092740-80092762+	11.5011	10.1557	14.9325	10.3087	14.3235	11.6708	13.4969	12.6727	7.16686	1.00789	1.09758	0.498561	0.730715	0.447733	0.68105	12.1964	12.101	11.1122	down	0	0
rno-miR-330-5p	chr1:80092701-80092722+	141.718	121.868	133.626	126.617	132.557	139.261	120.051	143.873	137.783	0.99693	0.98881	0.157964	0.418837	0.0212161	0.0732051	132.404	132.812	133.902	up	0	0
rno-miR-331-3p	chr7:34881110-34881130-	259.653	209.207	185.316	194.072	184.382	198.877	126.977	149.091	23.8298	1.1331	2.18133	0.690789	0.842105	0.264432	0.464575	218.059	192.444	99.9659	down	0	0
rno-miR-331-5p	chr7:34881166-34881184-	3.70376	3.3006	3.82884	0.224102	0.260427	0.47314	0.887953	0.149091	0.895857	11.3121	5.60463	0.0004294	0.00484969	0.00674214	0.0293436	3.61107	0.319223	0.6443	no	1	1
rno-miR-33-3p	chr7:123431657-123431677+	11.6961	8.88623	9.76354	9.86048	9.11493	10.4091	8.16917	7.75273	9.85443	1.03272	1.17728	0.525773	0.754945	0.541055	0.756293	10.1153	9.79484	8.59211	down	0	0
rno-miR-33-5p	chr7:123431617-123431637+	43.8603	43.9234	58.0069	21.962	25.001	33.7507	19.8902	25.0473	18.0963	1.80627	2.3129	0.0432986	0.188939	0.00759487	0.0312778	48.5969	26.9046	21.0113	down	0	1
rno-miR-336-5p	chr10:35349771-35349791+	0.194935	0	0	0.224102	0.260427	0.157713	0	0	0	0.303523	6.49783	0.463972	0.716713	0.83529	0.940087	0.0649783	0.214081	0	no	0	0
rno-miR-338-3p	chr10:109195254-109195276-	0.779739	0.253892	0.95721	0.896407	0.260427	1.41942	0.532772	0.298182	0.179171	0.772766	1.97089	0.586359	0.781813	0.636992	0.80784	0.663614	0.858751	0.336708	no	0	0
rno-miR-339-3p	chr12:17369052-17369074+	45.6147	54.0791	45.1803	47.9578	40.3661	50.1528	50.6133	38.4655	44.2553	1.0462	1.08655	0.308427	0.58412	0.0892138	0.217211	48.2914	46.1589	44.4447	down	0	0
rno-miR-339-5p	chr12:17369017-17369039+	85.1865	118.314	88.4462	78.4356	66.6692	93.0509	88.2626	85.28	95.14	1.22586	1.08659	0.929783	0.965226	0.074887	0.187462	97.3156	79.3852	89.5609	no	0	0
rno-miR-342-3p	chr6:132561229-132561251+	420.084	346.055	429.979	414.812	579.189	552.47	630.269	630.357	481.613	0.77345	0.686541	0.00939246	0.063856	1.68197e-05	0.000164141	398.706	515.49	580.746	up	0	0
rno-miR-342-5p	chr6:132561187-132561208+	19.6884	20.5653	18.3784	13.4461	14.3235	14.3519	13.8521	8.49818	10.0336	1.39198	1.81053	0.418186	0.672388	0.149296	0.312461	19.544	14.0405	10.7946	down	0	0
rno-miR-344a-3p	chr1:122309575-122309597-	0	0.761677	0.765768	0.224102	0.260427	0.157713	0	0.447273	0.358343	2.3783	1.896	0.567394	0.769646	0.815238	0.929274	0.509148	0.214081	0.268539	no	0	0
rno-miR-344b-1-3p	chr1:121193161-121193182-	0.584804	0.253892	0.574326	0.448203	0.260427	0	0.355181	0	0.358343	1.99402	1.98034	0.616201	0.804834	0.686339	0.846582	0.471007	0.23621	0.237841	no	0	0
rno-miR-345-3p	chr6:132749021-132749042+	61.0146	69.3126	58.5812	44.5962	52.3458	57.7231	41.201	48.4546	41.3886	1.2214	1.44156	0.93187	0.965226	0.703695	0.861071	62.9695	51.555	43.6814	down	0	0
rno-miR-345-5p	chr6:132748983-132749003+	96.4927	101.049	99.3584	93.2263	95.0557	92.1046	63.755	68.2837	57.8724	1.0589	1.56336	0.275476	0.552376	0.258354	0.459969	98.9667	93.4622	63.3037	down	0	0
rno-miR-3473	chr13:44719374-44719395+	1.94935	2.53892	1.91442	1.56871	1.82299	1.10399	2.84145	2.38546	1.61254	1.42418	0.936141	0.709881	0.8499	0.342879	0.563222	2.13423	1.49856	2.27982	no	0	0
rno-miR-34a-3p	chr5:167092554-167092575+	11.6961	11.4252	9.76354	3.13742	2.08341	3.94283	1.9535	1.19273	1.61254	3.58861	6.91037	0.000266572	0.00319886	9.91693e-08	1.40673e-06	10.9616	3.05455	1.58626	down	1	1
rno-miR-34a-5p	chr5:167092510-167092531+	466.284	473.255	485.688	348.926	319.023	370.626	297.82	293.56	317.85	1.37229	1.56751	0.212662	0.504088	0.13742	0.297354	475.076	346.192	303.077	down	0	0
rno-miR-34b-3p	chr8:55492554-55492575-	424.373	512.863	458.886	415.933	433.61	426.93	433.854	343.804	334.513	1.09373	1.25531	0.352276	0.620523	0.492225	0.71955	465.374	425.491	370.724	down	0	0
rno-miR-34b-5p	chr8:55492590-55492612-	787.146	949.05	840.43	550.17	639.087	613.978	500.45	489.913	452.766	1.42889	1.78544	0.138009	0.398463	0.00506398	0.0238957	858.875	601.078	481.043	down	0	0
rno-miR-34c-3p	chr8:55492034-55492055-	169.788	189.404	22.973	138.943	124.224	151.405	121.294	112.862	16.3046	0.92183	1.52585	0.506568	0.738779	0.869873	0.954617	127.388	138.191	83.4869	no	0	0
rno-miR-34c-5p	chr8:55492066-55492088-	20544	22254.9	22973.8	18407.9	18102	17288.5	15622.1	14763.1	16066.7	1.22258	1.41593	0.877176	0.946167	0.669243	0.837647	21924.2	17932.8	15484	down	0	0
rno-miR-350	chr13:43827552-43827575+	80.8979	70.0743	63.5587	66.3341	124.224	58.5117	62.3343	84.5346	35.8343	0.861328	1.1742	0.177854	0.452291	0.550868	0.76167	71.5103	83.0233	60.9011	no	0	0
rno-miR-351-3p	chrX:158149261-158149281+	45.2249	31.9904	34.8424	17.9281	24.7405	21.9222	19.535	21.6182	14.1545	1.73489	2.02608	0.0685435	0.253084	0.0619689	0.167141	37.3526	21.5303	18.4359	down	0	0
rno-miR-351-5p	chrX:158149221-158149245+	38084	33488.9	37905.9	55314.8	55770.4	57059.9	68816.4	71400	75576.8	0.651097	0.507332	2.86804e-07	5.24441e-06	3.72451e-17	1.0973e-15	36492.9	56048.4	71931.1	up	0	0
rno-miR-3542	chr17:9370948-9370968+	1.16961	1.01557	1.14865	0.896407	0.520853	0.94628	0.355181	0.745455	0.179171	1.41052	2.60495	0.808331	0.915631	0.379198	0.607908	1.11128	0.787847	0.426602	down	0	0
rno-miR-3549	chr10:67065916-67065934-	3.89869	0.761677	4.40316	0.672305	1.04171	1.10399	1.06554	1.34182	0.895857	3.21629	2.74385	0.103886	0.329675	0.2188	0.412301	3.02118	0.939335	1.10107	no	0	0
rno-miR-3558-5p	chr6:10992716-10992739+	3.11896	2.03114	2.2973	2.01692	1.30213	2.3657	1.59832	1.34182	2.15006	1.31007	1.46309	0.851401	0.931447	0.838603	0.940087	2.48247	1.89492	1.69673	down	0	0
rno-miR-3559-3p	chrX:75459266-75459287-	66.2778	106.381	81.3628	58.4906	53.127	61.5082	59.6705	52.3309	53.3931	1.46727	1.53585	0.237318	0.517785	0.466894	0.693102	84.6739	57.7086	55.1315	down	0	0
rno-miR-3559-5p	chrX:75459306-75459327-	184.603	237.135	196.037	172.558	194.278	233.416	187.891	164.149	161.792	1.02919	1.20229	0.25547	0.533221	0.248038	0.448106	205.925	200.084	171.277	down	0	0
rno-miR-3572	chr1:64135984-64136007-	0.779739	0.253892	0	0.224102	0.260427	0.315427	0	0.298182	0.179171	1.29211	2.16534	0.951509	0.966612	0.762813	0.901191	0.344544	0.266652	0.159118	down	0	0
rno-miR-3580-3p	chrX:151295627-151295648-	2.33922	3.3006	1.91442	2.91332	1.56256	2.68113	3.19663	3.57818	3.94177	1.0555	0.704911	0.724096	0.856265	0.0530645	0.148348	2.51808	2.38567	3.57219	no	0	0
rno-miR-3580-5p	chrX:151295661-151295682-	2.14428	3.04671	2.48875	1.34461	3.12512	2.68113	1.77591	1.78909	1.79171	1.07396	1.43367	0.784056	0.901429	0.912765	0.969185	2.55991	2.38362	1.78557	down	0	0
rno-miR-3585-3p	chrX:155344242-155344260+	0.389869	1.77725	0.95721	0.672305	0.260427	0.47314	0.177591	0.447273	0.537514	2.22234	2.68788	0.465233	0.716713	0.413179	0.640679	1.04144	0.468624	0.387459	down	0	0
rno-miR-3585-5p	chrX:155344207-155344228+	11.5011	9.64791	9.18921	0.224102	12.5005	0.157713	0.177591	0.149091	0.179171	2.35503	59.9744	0.442133	0.701567	4.73273e-09	8.66384e-08	10.1127	4.29411	0.168618	down	0	1
rno-miR-3594-3p	chr10:109244639-109244660-	1.16961	0.507785	0.95721	0.448203	0.260427	0.157713	0.355181	0.596364	0.179171	3.04106	2.33003	0.270611	0.549814	0.490196	0.71933	0.878202	0.288781	0.376905	no	0	0
rno-miR-361-3p	chrX:84708914-84708937-	54.5817	60.1725	54.1781	58.2665	41.9287	50.4683	36.9389	30.7127	37.8052	1.12126	1.60191	0.63456	0.817688	0.194497	0.374334	56.3108	50.2212	35.1523	down	0	0
rno-miR-361-5p	chrX:84708954-84708975-	186.358	123.138	164.449	145.442	174.486	146.989	126.977	155.502	143.337	1.01505	1.11303	0.373079	0.646649	0.281485	0.485626	157.982	155.639	141.939	down	0	0
rno-miR-362-3p	chrX:16117211-16117232+	39.1819	28.1821	27.7591	25.0994	30.2095	32.489	30.9008	31.6073	24.009	1.08343	1.09947	0.606869	0.798074	0.275394	0.477266	31.7077	29.266	28.839	down	0	0
rno-miR-362-5p	chrX:16117174-16117197+	43.2755	15.7413	43.8402	30.926	27.0844	18.137	20.2453	28.4764	25.6215	1.35076	1.38354	0.686508	0.842105	0.930256	0.971455	34.2857	25.3825	24.7811	down	0	0
rno-miR-374-3p	chrX:74443655-74443676-	176.026	111.459	139.561	63.869	74.7424	72.8636	47.2391	58.8909	9.31691	2.01937	3.69907	0.00514568	0.0395189	0.0189589	0.0698198	142.349	70.4917	38.4823	down	1	1
rno-miR-374-5p	chrX:74443685-74443706-	96.6876	115.521	108.93	95.4673	115.89	105.983	20.7781	83.64	63.785	1.01197	1.90923	0.192825	0.474647	0.353478	0.576094	107.046	105.78	56.0677	down	0	0
rno-miR-375-3p	chr9:82161725-82161746-	0	0.253892	0	0.896407	0	0	3.19663	0.596364	1.07503	0.283233	0.052155	0.493505	0.72887	0.00281015	0.0145444	0.0846307	0.298802	1.62267	up	0	1
rno-miR-378a-3p	chr18:56726153-56726173-	7751.97	10505.6	8789.29	5959.09	5566.88	5776.72	5208.56	4320.06	4867.19	1.56316	1.8788	0.025518	0.136096	0.00517975	0.0239017	9015.62	5767.56	4798.6	down	0	0
rno-miR-378a-5p	chr18:56726190-56726211-	40.9363	39.6072	41.5429	16.1353	18.7507	26.969	22.0212	22.5127	22.7548	1.97375	1.81437	0.0126005	0.0806432	0.0377901	0.112199	40.6955	20.6183	22.4296	no	0	0
rno-miR-384-3p	chrX:76301773-76301794-	31.3845	22.5964	20.2928	22.4102	22.1363	26.8113	14.5624	17.1455	13.4379	1.04086	1.6452	0.487081	0.722159	0.379347	0.607908	24.7579	23.7859	15.0486	down	0	0
rno-miR-384-5p	chrX:76301813-76301835-	7.01765	9.39402	11.2951	8.73997	4.42725	6.15082	3.7294	0.149091	0.179171	1.43424	6.82826	0.554003	0.76625	0.0269292	0.0859901	9.23559	6.43935	1.35255	down	0	1
rno-miR-411-5p	chr6:133858859-133858879+	0	0	0.191442	0.448203	0.520853	0.157713	0.177591	0.298182	0.537514	0.169904	0.188932	0.22625	0.508406	0.200853	0.384634	0.063814	0.37559	0.337762	no	0	0
rno-miR-421-3p	chrX:74443505-74443524-	1354.21	1274.79	1259.88	1300.69	1245.88	1220.07	1154.16	1036.93	1389.47	1.03245	1.08611	0.151364	0.418156	0.0728108	0.184679	1296.29	1255.55	1193.52	down	0	0
rno-miR-421-5p	chrX:74443541-74443561-	50.4881	79.9761	60.3042	21.7379	20.0529	18.6102	11.0106	12.3745	10.0336	3.15836	5.70843	1.0321e-07	2.20182e-06	4.55965e-14	1.16423e-12	63.5895	20.1337	11.1396	down	1	1
rno-miR-423-3p	chr10:63098412-63098434+	523.595	901.826	743.178	449.996	358.868	332.144	389.456	258.524	329.855	1.9006	2.21776	0.0133813	0.0810812	0.00896045	0.0357485	722.866	380.336	325.945	down	0	1
rno-miR-423-5p	chr10:63098376-63098399+	644.259	746.697	723.076	847.777	624.503	646.782	822.777	590.4	702.889	0.997626	0.999039	0.18303	0.46239	0.0130521	0.0499897	704.677	706.354	705.355	no	0	0
rno-miR-425-3p	chr8:117354872-117354892+	30.2149	31.4827	22.3987	24.8753	28.9074	29.8078	29.1249	21.6182	24.9048	1.00605	1.11168	0.298007	0.577953	0.229961	0.427549	28.0321	27.8635	25.216	down	0	0
rno-miR-425-5p	chr8:117354831-117354853+	489.091	458.783	447.974	467.252	475.279	515.407	433.499	437.433	456.887	0.957412	1.05123	0.0353111	0.169965	0.00735032	0.0305997	465.283	485.979	442.606	no	0	0
rno-miR-434-3p	chr6:133715427-133715448+	0	0	0	0.224102	0.260427	0.157713	0	0	0	0	1	0.344794	0.612967	-	-	0	0.214081	0	no	0	0
rno-miR-449a-3p	chr2:44897656-44897677+	0.584804	0.253892	0.382884	0	0	0	0	0	0	40.7193	40.7193	0.196743	0.478198	0.174198	0.35341	0.407193	0	0	no	0	0
rno-miR-449a-5p	chr2:44897616-44897637+	47.5641	82.2611	69.302	52.6639	28.1261	35.3278	26.2834	22.6618	39.0594	1.71487	2.26269	0.130731	0.38321	0.0268137	0.0859901	66.3757	38.7059	29.3349	down	0	1
rno-miR-449c-5p	chr2:44896085-44896105+	65.1082	58.3952	60.6871	51.5434	42.1891	41.6363	58.4273	46.2182	50.168	1.36066	1.18976	0.402096	0.657042	0.325162	0.540272	61.3968	45.1229	51.6045	no	0	0
rno-miR-450a-3p	chrX:158153428-158153448+	8.18726	6.09342	8.99777	7.61946	5.20853	0.94628	0.887953	3.42909	2.15006	1.69	3.59952	0.473242	0.716713	0.0216	0.0738643	7.75948	4.59142	2.1557	down	0	1
rno-miR-450a-5p	chrX:158153394-158153415+	5711.39	4419	4967.15	4925.98	4176.98	5176.15	3328.76	3466.96	4182.94	1.05732	1.37517	0.391587	0.65636	0.932652	0.971455	5032.51	4759.7	3659.55	down	0	0
rno-miR-450b-3p	chrX:158153296-158153316+	33.1389	36.5605	31.0136	30.2537	25.5218	38.6398	23.6196	21.4691	20.4255	1.0667	1.53727	0.474891	0.716713	0.395287	0.623025	33.571	31.4718	21.8381	down	0	0
rno-miR-450b-5p	chrX:158153261-158153281+	1239.98	1113.32	1265.62	1228.75	1062.54	1218.81	822.777	810.16	818.813	1.031	1.47606	0.223894	0.508406	0.452975	0.685729	1206.31	1170.03	817.25	down	0	0
rno-miR-455-3p	chr5:79097255-79097276+	88.6953	60.1725	67.9619	66.5582	114.067	69.7093	126.089	94.0764	126.137	0.86616	0.626128	0.158915	0.418837	1.81524e-05	0.00016957	72.2766	83.4448	115.434	up	0	0
rno-miR-455-5p	chr5:79097218-79097239+	190.061	263.794	209.629	153.061	164.329	162.129	161.785	151.327	168.242	1.38364	1.37837	0.296997	0.577953	0.949775	0.974032	221.161	159.84	160.451	no	0	0
rno-miR-463-3p	chrX:151276039-151276060-	1.16961	0.761677	0.574326	0.896407	0.260427	1.10399	0.532772	0.298182	1.07503	1.10827	1.3146	0.892364	0.946596	0.980264	0.98541	0.835204	0.753608	0.635328	down	0	0
rno-miR-463-5p	chrX:151276077-151276097-	10.9163	10.6635	12.2523	11.6533	7.8128	10.7245	12.7865	8.05091	9.85443	1.12062	1.10232	0.768583	0.894351	0.36679	0.592745	11.2774	10.0635	10.2306	no	0	0
rno-miR-466b-5p	chr17:71809097-71809118-	50.4881	47.7318	52.0722	26.444	25.2614	24.761	25.7506	20.4255	16.4838	1.96547	2.39854	0.00105504	0.0106615	0.00116076	0.00683958	50.0974	25.4888	20.8866	down	0	1
rno-miR-466c-5p	chr17:72060125-72060145-	30.0199	26.9126	33.1195	17.704	15.886	16.4022	16.8711	13.5673	12.1837	1.80132	2.1128	0.0238263	0.128864	0.0161875	0.0607826	30.0173	16.6641	14.2074	down	0	1
rno-miR-471-3p	chrX:151272117-151272136-	0.779739	0.761677	0.95721	0.448203	1.04171	0.94628	0.710363	0.298182	0.716686	1.02563	1.44828	0.822374	0.923118	0.901966	0.967661	0.832875	0.812064	0.575077	down	0	0
rno-miR-471-5p	chrX:151272150-151272171-	4.28856	3.80839	1.91442	2.46512	6.77109	3.78512	1.9535	5.81455	1.79171	0.768844	1.04724	0.296259	0.577953	0.560946	0.764563	3.33712	4.34044	3.18659	no	0	0
rno-miR-483-3p	chr1:215832094-215832115-	24.3668	33.2599	24.1217	18.3763	14.5839	13.8788	12.9641	14.0145	12.542	1.74531	2.0685	0.0579094	0.230238	0.0198424	0.0703669	27.2495	15.613	13.1735	down	0	1
rno-miR-483-5p	chr1:215832132-215832153-	8.77206	14.4719	12.6352	6.94715	7.55237	9.14737	9.5899	7.45455	6.271	1.51729	1.53886	0.375528	0.646649	0.635087	0.80784	11.9597	7.8823	7.77182	down	0	0
rno-miR-484	chr10:27855-27876-	18.5188	24.3737	24.696	23.5307	17.9694	23.1839	18.1142	17.5927	19.3505	1.0449	1.2276	0.451527	0.713524	0.543057	0.75633	22.5295	21.5613	18.3525	down	0	0
rno-miR-490-3p	chr4:63343001-63343022+	0	0	0	0.224102	0.520853	0.157713	0.177591	0.298182	0.358343	0	0	0.219541	0.504813	0.184923	0.364797	0	0.300889	0.278039	no	0	0
rno-miR-497-5p	chr10:56844978-56844999+	159.846	190.927	145.304	154.182	173.705	192.095	152.018	145.215	134.379	0.954027	1.14936	0.071395	0.256221	0.119458	0.271343	165.359	173.327	143.871	no	0	0
rno-miR-499-3p	chr3:151138903-151138924+	0.584804	0.761677	0.382884	0.224102	0.260427	0.157713	0.177591	0.298182	0.537514	2.6927	1.70669	0.418491	0.672388	0.8037	0.924376	0.576455	0.214081	0.337762	no	0	0
rno-miR-499-5p	chr3:151138866-151138886+	7.79739	10.1557	7.46624	6.94715	8.85451	8.98966	10.833	7.30546	8.24188	1.02533	0.963571	0.495961	0.72969	0.13258	0.290161	8.47311	8.26377	8.79345	no	0	0
rno-miR-500-3p	chrX:16121380-16121401+	64.5234	60.6803	57.0497	50.647	42.71	65.6088	57.1842	61.7237	47.8388	1.14649	1.093	0.777459	0.89653	0.122832	0.276733	60.7511	52.9886	55.5822	no	0	0
rno-miR-500-5p	chrX:16121342-16121365+	3.70376	3.55449	1.91442	2.24102	2.34384	1.73485	0.532772	0.447273	2.32923	1.45144	2.77181	0.655868	0.828364	0.228997	0.427549	3.05756	2.10657	1.10309	down	0	0
rno-miR-501-3p	chrX:16117924-16117946+	176.026	17.5186	137.455	113.171	49.4811	34.2238	82.0469	102.575	85.8231	1.68126	1.22391	0.484374	0.722072	0.859033	0.950895	110.333	65.6253	90.1483	no	0	0
rno-miR-501-5p	chrX:16117887-16117906+	4.28856	4.06228	3.44595	4.70614	7.8128	7.0971	4.79495	5.96364	3.58343	0.601385	0.822533	0.0269591	0.136415	0.10256	0.241967	3.93226	6.53868	4.78067	no	0	0
rno-miR-503-3p	chrX:158148521-158148543+	127.487	103.588	100.507	51.3193	35.418	46.8409	21.1333	39.36	11.2878	2.48231	4.61935	1.90354e-05	0.000252055	0.000222212	0.00157606	110.527	44.5261	23.927	down	1	1
rno-miR-503-5p	chrX:158148481-158148503+	53.9969	52.8096	49.2006	26.8922	21.355	30.9118	20.6005	23.4073	16.3046	1.97081	2.58665	0.00248834	0.0207723	0.00013604	0.00102163	52.0024	26.3863	20.1041	down	0	1
rno-miR-505-3p	chrX:143517019-143517038-	329.83	346.309	317.985	360.131	493.248	430.4	391.41	286.106	332.184	0.774373	0.984574	0.00163272	0.0145805	0.00511606	0.0238957	331.375	427.926	336.567	no	0	0
rno-miR-505-5p	chrX:143517053-143517075-	11.5011	10.4096	10.1464	13.222	17.9694	5.99311	7.99158	9.54182	8.7794	0.862109	1.21831	0.31934	0.595274	0.593291	0.778187	10.6857	12.3948	8.77093	no	0	0
rno-miR-5132-5p	chrX:156716805-156716826+	0.194935	0.507785	0.382884	0	0	0	0	0.149091	0.537514	36.1868	1.58112	0.248731	0.530626	0.90509	0.96818	0.361868	0	0.228868	no	0	0
rno-miR-532-3p	chrX:16109917-16109938+	153.414	151.574	156.6	160.457	174.225	190.991	173.861	169.218	145.129	0.87809	0.945474	0.00947429	0.063856	0.00177459	0.00970956	153.863	175.224	162.736	no	0	0
rno-miR-532-5p	chrX:16109880-16109901+	1767.86	2131.93	1884.17	1515.82	1305.26	1582.81	1396.93	1382.97	1339.66	1.31338	1.40402	0.422484	0.67317	0.75266	0.899777	1927.99	1467.96	1373.19	down	0	0
rno-miR-542-3p	chrX:158152194-158152215+	1704.51	2672.47	2157.36	1507.31	1022.96	1099.26	710.718	600.389	837.805	1.80033	3.04077	0.023685	0.128864	8.79213e-07	1.05231e-05	2178.11	1209.84	716.304	down	0	1
rno-miR-542-5p	chrX:158152156-158152177+	200.588	226.98	206.949	214.241	182.299	220.641	189.134	170.56	171.109	1.02809	1.19539	0.159773	0.418837	0.144966	0.30675	211.506	205.727	176.934	down	0	0
rno-miR-582-3p	chr2:40863797-40863818+	228.269	307.718	227.242	291.556	247.666	287.827	292.847	211.709	263.561	0.922834	0.993636	0.0377231	0.174526	0.0229904	0.0772398	254.41	275.683	256.039	no	0	0
rno-miR-582-5p	chr2:40863760-40863781+	25.3415	22.3425	21.4415	12.9979	33.0742	16.0868	31.4335	28.9236	14.1545	1.11208	0.927715	0.788581	0.902865	0.140676	0.302691	23.0418	20.7196	24.8372	no	0	0
rno-miR-592	chr4:55182426-55182448-	295.716	350.625	315.688	367.975	320.846	399.803	340.974	321.589	309.967	0.883711	0.989202	0.00681878	0.049404	0.000484301	0.00314385	320.676	362.875	324.177	no	0	0
rno-miR-598-3p	chr15:46893204-46893225+	98.2471	117.298	111.994	86.9515	87.2429	100.621	60.736	67.24	57.6932	1.19185	1.7641	0.935063	0.965226	0.04444	0.127019	109.18	91.6051	61.8897	down	0	0
rno-miR-598-5p	chr15:46893167-46893188+	0.584804	2.03114	0.574326	0.448203	0	0	0	0	0	7.11791	106.342	0.128887	0.38321	0.0164812	0.0612844	1.06342	0.149401	0	down	0	1
rno-miR-6315	chr1:221434051-221434073-	6.82272	9.64791	7.84912	5.37844	7.29195	5.20454	0.710363	5.81455	6.271	1.36055	1.90059	0.650909	0.828117	0.540723	0.756293	8.10658	5.95831	4.2653	down	0	0
rno-miR-6317	chr1:259080746-259080766-	2.53415	2.53892	4.59461	1.34461	3.12512	2.99655	1.06554	2.98182	2.5084	1.29485	1.47468	0.851241	0.931447	0.863951	0.953583	3.22256	2.48876	2.18525	down	0	0
rno-miR-6318	chr19:37262650-37262671-	15.9846	18.788	15.1239	0.224102	15.6256	0.315427	0.177591	10.5855	0.179171	3.08668	4.55998	0.260917	0.541579	0.180212	0.358504	16.6322	5.38838	3.64742	down	0	0
rno-miR-6319	chr17:34746623-34746643+	1.55948	4.06228	1.91442	0.896407	0.520853	1.89256	2.48627	0.149091	0.179171	2.27692	2.6776	0.307863	0.58412	0.398137	0.624944	2.51206	1.10327	0.938177	down	0	0
rno-miR-6321	chr14:21097416-21097438-	21.053	20.0575	23.5474	18.1522	21.355	19.7142	14.9176	18.7855	14.1545	1.0918	1.35105	0.61939	0.806257	0.964527	0.977286	21.5526	19.7405	15.9525	down	0	0
rno-miR-6324	chr11:36383559-36383581-	14.2302	13.2024	12.4437	8.73997	7.55237	5.83539	8.16917	5.96364	10.2128	1.8021	1.63793	0.0863507	0.296059	0.406394	0.635302	13.2921	7.37591	8.1152	no	0	0
rno-miR-6328	chr20:3394869-3394889+	40.9363	34.0216	39.437	43.2516	28.9074	27.4421	8.34676	45.0255	9.13774	1.14853	1.83003	0.844972	0.929712	0.55698	0.764563	38.1316	33.2004	20.8367	down	0	0
rno-miR-6329	chr8:56629648-56629670-	31.9693	26.6587	30.6307	32.0465	30.7303	25.865	24.5075	22.3636	26.3382	1.00696	1.21923	0.335543	0.612967	0.510696	0.732572	29.7529	29.5473	24.4031	down	0	0
rno-miR-652-3p	chrX:114002584-114002604+	63.3538	59.4108	60.3042	51.7675	43.7517	56.3037	54.1651	47.8582	42.822	1.2058	1.26389	0.976687	0.989572	0.585496	0.773098	61.0229	50.6076	48.2818	down	0	0
rno-miR-652-5p	chrX:114002543-114002565+	1.16961	1.26946	0.574326	1.79281	1.56256	1.73485	0.710363	0	1.43337	0.591997	1.40568	0.187501	0.465296	0.961883	0.977192	1.00447	1.69674	0.714578	no	0	0
rno-miR-664-2-5p	chr13:103192581-103192601+	11.6961	14.4719	12.8266	7.39536	4.68768	8.51652	6.39326	6.26182	7.70437	1.89298	1.91531	0.0789031	0.280544	0.108085	0.249376	12.9982	6.86652	6.78648	down	0	0
rno-miR-664-3p	chr13:103192618-103192639+	29.6301	26.6587	32.7366	37.425	42.4495	59.1425	38.5372	45.3237	46.4054	0.640392	0.683411	0.0014506	0.0139347	2.77677e-05	0.000236334	29.6751	46.339	43.4221	no	0	0
rno-miR-671	chr4:7108758-7108778-	120.86	151.32	131.329	34.9599	24.2197	29.6501	31.6111	27.2836	26.5174	4.5425	4.72426	7.26796e-18	3.10099e-16	3.2031e-23	1.11526e-21	134.503	29.6099	28.4707	down	1	1
rno-miR-672-5p	chrX:74982117-74982139-	1.55948	0.761677	1.34009	1.12051	1.56256	1.57713	1.06554	0.745455	1.2542	0.859407	1.19446	0.567678	0.769646	0.852701	0.949374	1.22042	1.42007	1.02173	no	0	0
rno-miR-674-3p	chr3:108864507-108864528+	69.2018	70.0743	78.2998	87.1756	75.7842	72.2327	84.3556	74.8437	79.9104	0.925097	0.909942	0.0709853	0.256221	0.000935044	0.00559565	72.5253	78.3975	79.7032	up	0	0
rno-miR-674-5p	chr3:108864472-108864493+	32.5541	34.7833	32.3537	33.8394	20.8341	26.0227	28.4145	24.8982	24.009	1.23539	1.2893	0.883798	0.946596	0.689644	0.846582	33.2304	26.8987	25.7739	down	0	0
rno-miR-675-3p	chr1:215745995-215746015-	87.7206	133.547	102.23	100.846	100.264	120.966	88.4401	77.9746	71.6686	1.00441	1.35876	0.22499	0.508406	0.958618	0.976464	107.833	107.359	79.3611	down	0	0
rno-miR-675-5p	chr1:215746029-215746050-	5.84804	5.07785	3.82884	5.37844	4.16683	3.62741	2.84145	3.13091	1.61254	1.1201	1.94528	0.837922	0.927268	0.328925	0.543009	4.91824	4.39089	2.5283	down	0	0
rno-miR-676	chrX:70207069-70207090+	1174.48	1248.39	1156.88	1133.06	925.035	1066.62	1012.98	1064.06	1230.01	1.14562	1.08246	0.651871	0.828117	0.0304661	0.0948659	1193.25	1041.57	1102.35	no	0	0
rno-miR-702-3p	chr12:22721850-22721872-	66.4727	62.4575	69.6849	75.0741	75.5237	69.7093	63.3999	59.3382	60.0224	0.901537	1.08675	0.0383763	0.175434	0.0688648	0.177015	66.205	73.4357	60.9202	no	0	0
rno-miR-702-5p	chr12:22721932-22721952-	43.0806	42.9078	40.9686	2.46512	2.08341	2.68113	1.06554	1.04364	1.07503	17.5606	39.8708	9.37232e-29	5.99829e-27	8.77389e-33	8.401e-31	42.319	2.40989	1.0614	down	1	1
rno-miR-708-3p	chr1:161221302-161221323+	0.584804	0.761677	0.574326	0	0.520853	0	0.177591	0	0	3.68781	10.8159	0.328928	0.604347	0.102978	0.241967	0.640269	0.173618	0.059197	down	0	0
rno-miR-741-3p	chrX:151274373-151274394-	3.89869	5.07785	3.6374	6.05075	2.60427	4.10055	4.79495	4.77091	6.271	0.988897	0.796492	0.567213	0.769646	0.0572777	0.157823	4.20465	4.25186	5.27895	up	0	0
rno-miR-742-3p	chrX:151260323-151260344-	0.389869	0.507785	0.191442	0	0	0	0	0.149091	0	36.3032	7.30491	0.248634	0.530626	0.316524	0.533159	0.363032	0	0.049697	no	0	0
rno-miR-743a-3p	chrX:151252838-151252859-	6.62778	4.57006	7.08335	7.17126	6.51067	6.30853	5.50531	5.36727	4.65846	0.914496	1.17707	0.367398	0.641276	0.635286	0.80784	6.09373	6.66349	5.17701	no	0	0
rno-miR-743a-5p	chrX:151252872-151252893-	0.584804	1.01557	0.382884	0.448203	0	0.47314	0.355181	0.745455	0.358343	2.15257	1.35935	0.591698	0.786201	0.951144	0.974032	0.661086	0.307114	0.486326	no	0	0
rno-miR-743b-3p	chrX:151253328-151253349-	28.0706	26.9126	31.5879	33.8394	29.1678	34.8547	36.2285	28.1782	34.4009	0.884625	0.876158	0.0640723	0.246446	0.00573643	0.0259472	28.857	32.6206	32.9359	up	0	0
rno-miR-743b-5p	chrX:151253363-151253384-	2.72909	5.07785	2.2973	2.46512	3.12512	1.89256	2.30868	2.08727	2.5084	1.35033	1.46346	0.802715	0.91196	0.89455	0.967661	3.36808	2.49427	2.30145	down	0	0
rno-miR-760-3p	chr2:225873366-225873385-	30.4098	40.6228	22.7816	29.3573	31.5116	26.0227	23.6196	16.9964	20.6047	1.07967	1.53239	0.556585	0.76625	0.580099	0.773098	31.2714	28.9639	20.4069	down	0	0
rno-miR-760-5p	chr2:225873401-225873422-	1.75441	2.53892	1.91442	0.224102	0.78128	0.315427	0	0	0.179171	4.69996	34.6471	0.0364014	0.170465	0.00142747	0.00792348	2.06925	0.44027	0.0597237	down	1	1
rno-miR-7a-1-3p	chr17:6675075-6675096+	27.4858	20.8192	27.1848	16.3594	12.7609	7.0971	4.43977	8.05091	5.55431	2.08435	4.18342	0.0450361	0.192154	1.71426e-05	0.000164141	25.1633	12.0725	6.015	down	1	1
rno-miR-7a-5p	chr1:140576414-140576436+	274.858	239.42	185.507	97.7084	146.099	146.673	82.2245	135.524	109.115	1.79211	2.14091	0.0358521	0.169965	0.0296561	0.0931007	233.262	130.16	108.954	down	0	1
rno-miR-802-3p	chr11:33570310-33570332+	0.194935	0.253892	0.382884	0.224102	0	0	0	0.149091	0	3.71131	5.57855	0.475338	0.716713	0.430023	0.658795	0.277237	0.0747007	0.049697	down	0	0
rno-miR-802-5p	chr11:33570272-33570292+	0	1.01557	0	0.448203	0.520853	0.630853	0.355181	0.745455	0	0.634767	0.922712	0.552125	0.76625	0.771777	0.901191	0.338523	0.533303	0.366879	no	0	0
rno-miR-871-3p	chrX:151287798-151287819-	38.792	1.77725	42.6916	28.2368	8.33365	3.78512	19.8902	16.9964	14.8712	2.06318	1.60866	0.401207	0.657042	0.747965	0.898027	27.7536	13.4519	17.2526	no	0	0
rno-miR-872-3p	chr5:113657776-113657797+	1345.05	1502.28	1413.42	1532.18	1597.46	1797.77	2042.65	1841.57	1642.11	0.864704	0.770991	0.00145153	0.0139347	4.37754e-08	6.7064e-07	1420.25	1642.47	1842.11	up	0	0
rno-miR-872-5p	chr5:113657737-113657757+	1089.69	1272	1059.25	1079.95	1188.59	1372.26	1054.36	1025.6	1025.58	0.939612	1.10156	0.0358088	0.169965	0.00965759	0.0381325	1140.31	1213.6	1035.18	no	0	0
rno-miR-874-3p	chr17:7025058-7025079+	47.759	36.0527	39.8199	34.2876	44.2725	53.3071	44.7528	49.6473	46.9429	0.937546	0.874692	0.210921	0.503066	0.00575851	0.0259472	41.2105	43.9557	47.1143	up	0	0
rno-miR-874-5p	chr17:7025023-7025043+	5.65311	6.09342	4.21172	3.36153	4.16683	5.20454	3.01904	2.83273	1.43337	1.25331	2.19052	0.925395	0.965226	0.18859	0.364797	5.31942	4.2443	2.42838	down	0	0
rno-miR-877	chr20:3318872-3318891+	42.6907	51.0324	46.7118	59.8352	53.6479	44.7906	83.6452	64.8546	70.7727	0.887291	0.640458	0.0534125	0.215899	4.75041e-09	8.66384e-08	46.8116	52.7579	73.0908	up	0	0
rno-miR-878	chrX:151283471-151283492-	0.584804	1.01557	0.765768	0.224102	1.30213	0.788567	1.24313	0.149091	0.716686	1.02218	1.12198	0.824556	0.923118	0.811713	0.928018	0.788714	0.7716	0.702969	down	0	0
rno-miR-879-5p	chr4:21673680-21673700-	0.584804	0.761677	0.574326	0.672305	0.78128	0.157713	0.177591	0.149091	0.537514	1.19209	2.22265	0.982104	0.992442	0.567909	0.771309	0.640269	0.537099	0.288065	down	0	0
rno-miR-880-3p	chrX:151281998-151282019-	4.4835	7.61677	2.87163	4.25793	3.64597	5.04683	5.86049	4.32364	3.40426	1.15607	1.10182	0.856419	0.934276	0.518246	0.73854	4.99063	4.31691	4.52946	no	0	0
rno-miR-881-3p	chrX:151283921-151283942-	60.2348	71.0899	58.3898	52.2157	58.8564	58.1962	51.6789	54.2691	10.7503	1.12079	1.62568	0.577595	0.777211	0.662557	0.834735	63.2382	56.4228	38.8994	down	0	0
rno-miR-881-5p	chrX:151283958-151283976-	0.194935	0	0.191442	0.672305	0.520853	0	0.532772	0.149091	0.179171	0.323827	0.448736	0.393132	0.65636	0.42167	0.651208	0.128792	0.397719	0.287011	no	0	0
rno-miR-883-3p	chrX:151260713-151260734-	1.16961	1.52335	0	0.672305	0.260427	0.157713	0.177591	1.34182	0.179171	2.4696	1.58542	0.507911	0.738779	0.934553	0.971455	0.897653	0.363482	0.566194	no	0	0
rno-miR-92a-1-5p	chr15:100180596-100180618+	364.528	330.06	358.954	12.7738	14.5839	9.4628	7.45881	7.00727	6.271	28.6129	50.8047	2.87484e-70	5.51969e-68	7.1793e-118	2.7497e-115	351.181	12.2735	6.91236	down	1	1
rno-miR-92a-3p	chr15:100180633-100180653+	39676.4	43867.8	41057.8	44460.2	37257.7	41510.8	36487.2	30841.1	32478.9	1.01114	1.24843	0.0901059	0.300875	0.308502	0.522815	41534	41076.2	33269.1	down	0	0
rno-miR-92b-3p	chr2:188541044-188541065-	145.811	113.236	135.732	168.3	183.08	145.569	182.741	258.226	245.465	0.794405	0.575117	0.0114406	0.0747689	1.47814e-06	1.61751e-05	131.593	165.65	228.811	up	0	0
rno-miR-93-3p	chr12:19307555-19307577-	32.3592	29.4515	31.205	23.9789	23.6988	23.657	18.1142	18.9346	19.3505	1.30393	1.64924	0.593984	0.786517	0.202939	0.386695	31.0052	23.7782	18.7998	down	0	0
rno-miR-93-5p	chr12:19307593-19307615-	3352.1	4224.51	3711.1	2823.68	3676.96	4397.68	2941.61	2602.53	2214.02	1.03573	1.45495	0.340331	0.612967	0.60751	0.791417	3762.57	3632.77	2586.05	down	0	0
rno-miR-96-5p	chr4:57463426-57463448-	2.33922	0.761677	3.6374	2.01692	2.08341	2.52341	1.06554	1.49091	2.86674	1.01729	1.2425	0.790007	0.902865	0.913513	0.969185	2.2461	2.20791	1.80773	down	0	0
rno-miR-99a-3p	chr11:16052202-16052223+	77.3891	91.909	73.8966	33.8394	37.241	39.5861	27.8817	31.7564	35.4759	2.19755	2.55688	1.22008e-05	0.000173522	8.97622e-06	9.2916e-05	81.0649	36.8888	31.7047	down	1	1
rno-miR-99a-5p	chr11:16052165-16052186+	1864.94	841.399	1516.99	1361.19	1234.68	1358.86	1077.8	1506.71	1108.53	1.06792	1.14359	0.653436	0.828117	0.520642	0.73854	1407.78	1318.24	1231.01	down	0	0
rno-miR-99b-3p	chr1:59704260-59704281+	133.53	205.399	139.944	113.62	82.5552	109.768	115.612	96.9091	100.336	1.56523	1.53064	0.130368	0.38321	0.465189	0.693102	159.624	101.981	104.286	no	0	0
rno-miR-99b-5p	chr1:59704222-59704243+	27705.9	3420.95	27474	19518.8	7338.82	5404.36	14573.8	18006.5	13804.4	1.81641	1.26337	0.385707	0.655361	0.907511	0.96818	19533.6	10754	15461.6	no	0	0
rno-miR-9a-5p	chr1:141229368-141229390+	7.01765	9.39402	6.31758	4.48203	5.98981	5.36225	5.15013	6.26182	4.30011	1.43546	1.44661	0.542212	0.766034	0.867675	0.954617	7.57642	5.27803	5.23735	down	0	0
0A/B/C, 12A/B/C and 24A/B/C represent samples collected at 0, 12 and 24 h of Dox treatment, respectively. Differential expression was analyzed with DESeq2 (R package). Significant differential expression was considered as P≤0.05 and fc ≥2 or ≤0.5. For the selection of upregulated and downregulated miRNAs, the miRNA TPM average had to be >10 at the 0 h time-point, and the miRNA expression had to b…
